# Supplementary material for: Very early environmental enrichment protects against apoptosis and improves functional recovery from hypoxic–ischemic brain injury
Source: Front Mol Neurosci. 2023 Feb 7;15:1019173. doi: 10.3389/fnmol.2022.1019173 (PMC9942523; doi:10.3389/fnmol.2022.1019173)
Supplement: Supplementary file 1 [file Table_1.XLSX]

## Sheet: FC
Gene_Symbol	Description	Very early EE-Cortex/Very early SC-Cortex.fc
Eno1b	enolase 1B, retrotransposed	534.848
Rps27rt	ribosomal protein S27, retrogene	153.169
Mir207	microRNA 207	18.3177
Myh6	myosin, heavy polypeptide 6, cardiac muscle, alpha	16.4019
Amd1	S-adenosylmethionine decarboxylase 1	14.0361
Mgat4a	mannoside acetylglucosaminyltransferase 4, isoenzyme A	12.9426
Oxt	oxytocin	12.8546
Dpys	dihydropyrimidinase	12.0253
Gfra1	glial cell line derived neurotrophic factor family receptor alpha 1	10.0493
Sap25	sin3 associated polypeptide	9.43922
Phc3	polyhomeotic-like 3 (Drosophila)	8.48697
Mab21l2	mab-21-like 2 (C. elegans)	8.15475
Srl	sarcalumenin	8.12954
H2-Bl	histocompatibility 2, blastocyst	8.03829
Gm12191	predicted gene 12191	7.44959
Gfra4	glial cell line derived neurotrophic factor family receptor alpha 4	7.16865
Piwil1	piwi-like RNA-mediated gene silencing 1	6.89914
Fam134c	family with sequence similarity 134, member C	5.40442
Kcnh8	potassium voltage-gated channel, subfamily H (eag-related), member 8	5.29727
Psmb11	proteasome (prosome, macropain) subunit, beta type, 11	5.23986
Gm16998	predicted gene, 16998	5.03519
Abi2	abl-interactor 2	4.88494
Ttn	titin	4.70004
Omp	olfactory marker protein	4.69471
Gm9767	predicted gene 9767	4.57343
Hfe2	hemochromatosis type 2 (juvenile)	4.4764
Mir8114	microRNA 8114	4.41945
Igsf9b	immunoglobulin superfamily, member 9B	4.40564
Mir412	microRNA 412	4.40234
Barx2	BarH-like homeobox 2	4.31919
Pou6f2	POU domain, class 6, transcription factor 2	4.29202
9430065F17Rik	RIKEN cDNA 9430065F17 gene	4.22378
1700001G11Rik	RIKEN cDNA 1700001G11 gene	4.20565
Mir8112	microRNA 8112	4.05126
Gtf2a1	general transcription factor II A, 1	3.95711
Zfp972	zinc finger protein 972	3.94211
Apoa1	apolipoprotein A-I	3.90645
Defb1	defensin beta 1	3.90645
Gm21949	predicted gene, 21949	3.87407
Fsd2	fibronectin type III and SPRY domain containing 2	3.81809
Tcap	titin-cap	3.62658
Prss45	protease, serine 45	3.6193
H2-Q8	histocompatibility 2, Q region locus 8	3.60099
Smarca5-ps	SWI/SNF related, matrix associated, actin depenent ragulator of chromatin, subfamily a, member 5, pseudogene	3.59268
B930018H19Rik	RIKEN cDNA B930018H19 gene	3.58113
Gm2027	predicted gene 2027	3.58113
Kiss1	KiSS-1 metastasis-suppressor	3.55971
Ncoa2	nuclear receptor coactivator 2	3.51163
Lhx5	LIM homeobox protein 5	3.47057
Irs4	insulin receptor substrate 4	3.42189
Esrrb	estrogen related receptor, beta	3.41306
Mir128-1	microRNA 128-1	3.33193
Mir7080	microRNA 7080	3.33193
Avp	arginine vasopressin	3.29317
Ly75	lymphocyte antigen 75	3.27558
Gm7120	predicted gene 7120	3.21179
Aadat	aminoadipate aminotransferase	3.19598
4930405A21Rik	RIKEN cDNA 4930405A21 gene	3.19598
Gm10789	predicted gene 10789	3.19598
9130019P16Rik	RIKEN cDNA 9130019P16 gene	3.19598
Nutf2	nuclear transport factor 2	3.18145
Atoh7	atonal bHLH transcription factor 7	3.14794
Enpp3	ectonucleotide pyrophosphatase/phosphodiesterase 3	3.13574
Gabre	gamma-aminobutyric acid (GABA) A receptor, subunit epsilon	3.13351
Ism2	isthmin 2	3.10721
Gm10785	predicted gene 10785	3.10721
Arpp21	cyclic AMP-regulated phosphoprotein, 21	3.09968
4933424G06Rik	RIKEN cDNA 4933424G06 gene	3.08931
B230312C02Rik	RIKEN cDNA B230312C02 gene	3.08931
Rsph6a	radial spoke head 6 homolog A (Chlamydomonas)	3.07924
Gpx1	glutathione peroxidase 1	3.01124
Rerg	RAS-like, estrogen-regulated, growth-inhibitor	2.98235
C2cd4b	C2 calcium-dependent domain containing 4B	2.94683
Agmat	agmatine ureohydrolase (agmatinase)	2.93944
Teddm2	transmembrane epididymal family member 2	2.93944
Cbfa2t3	core-binding factor, runt domain, alpha subunit 2, translocated to, 3 (human)	2.93096
Slc35g3	solute carrier family 35, member G3	2.9121
1810041H14Rik	RIKEN cDNA 1810041H14 gene	2.9121
Iqcj	IQ motif containing J	2.9121
Wnt2b	wingless-type MMTV integration site family, member 2B	2.90829
Uts2r	urotensin 2 receptor	2.85926
Fgf3	fibroblast growth factor 3	2.85127
Pik3r1	phosphatidylinositol 3-kinase, regulatory subunit, polypeptide 1 (p85 alpha)	2.84375
Trh	thyrotropin releasing hormone	2.76662
Mageb3	melanoma antigen, family B, 3	2.75992
3110021A11Rik	RIKEN cDNA 3110021A11 gene	2.75992
Gm17801	predicted gene, 17801	2.74488
Brd4	bromodomain containing 4	2.74324
Hcrtr1	hypocretin (orexin) receptor 1	2.73971
Tmem114	transmembrane protein 114	2.73441
Avpr1a	arginine vasopressin receptor 1A	2.70657
0610038B21Rik	RIKEN cDNA 0610038B21 gene	2.70071
Fut2	fucosyltransferase 2	2.6813
2310002F09Rik	RIKEN cDNA 2310002F09 gene	2.6813
Sept5	septin 5	2.66739
1700012D01Rik	RIKEN cDNA 1700012D01 gene	2.66291
Sla	src-like adaptor	2.65685
Pfkfb3	6-phosphofructo-2-kinase/fructose-2,6-biphosphatase 3	2.64947
Srms	src-related kinase lacking C-terminal regulatory tyrosine and N-terminal myristylation sites	2.63329
2410137M14Rik	RIKEN cDNA 2410137M14 gene	2.63329
Cort	cortistatin	2.59899
Gopc	golgi associated PDZ and coiled-coil motif containing	2.56968
Fam178b	family with sequence similarity 178, member B	2.56006
Cdsn	corneodesmosin	2.55506
Lypd1	Ly6/Plaur domain containing 1	2.55456
Pgr15l	G protein-coupled receptor 15-like	2.55159
Aqp5	aquaporin 5	2.54578
Slc25a2	solute carrier family 25 (mitochondrial carrier, ornithine transporter) member 2	2.53532
Ush1g	Usher syndrome 1G	2.53091
Strc	stereocilin	2.52628
Lao1	L-amino acid oxidase 1	2.50684
Cdkn3	cyclin-dependent kinase inhibitor 3	2.48075
Limk1	LIM-domain containing, protein kinase	2.47065
Myl4	myosin, light polypeptide 4	2.46898
Tmem97	transmembrane protein 97	2.46069
Cpne9	copine family member IX	2.43523
D630039A03Rik	RIKEN cDNA D630039A03 gene	2.42576
Gm15816	predicted gene 15816	2.42165
C1qtnf9	C1q and tumor necrosis factor related protein 9	2.42073
Ggps1	geranylgeranyl diphosphate synthase 1	2.41332
Cyp27b1	cytochrome P450, family 27, subfamily b, polypeptide 1	2.41311
Sds	serine dehydratase	2.40707
Abca13	ATP-binding cassette, sub-family A (ABC1), member 13	2.40707
Tal2	T cell acute lymphocytic leukemia 2	2.40257
AA543186	expressed sequence AA543186	2.40257
Bco1	beta-carotene oxygenase 1	2.39633
Il31ra	interleukin 31 receptor A	2.39633
Prlhr	prolactin releasing hormone receptor	2.39633
Btn2a2	butyrophilin, subfamily 2, member A2	2.37999
Fbxl3	F-box and leucine-rich repeat protein 3	2.37379
Tnnc1	troponin C, cardiac/slow skeletal	2.37216
Mir1839	microRNA 1839	2.37189
Ube4a	ubiquitination factor E4A	2.35797
Xkr6	X-linked Kx blood group related 6	2.35524
B230319C09Rik	RIKEN cDNA B230319C09 gene	2.34702
Grin2b	glutamate receptor, ionotropic, NMDA2B (epsilon 2)	2.34527
Gm14327	predicted gene 14327	2.34253
Mir6970	microRNA 6970	2.34253
Spata21	spermatogenesis associated 21	2.33769
Doc2g	double C2, gamma	2.33755
6720468P15Rik	RIKEN cDNA 6720468P15 gene	2.33462
Colq	collagen-like tail subunit (single strand of homotrimer) of asymmetric acetylcholinesterase	2.32941
Tmem40	transmembrane protein 40	2.32012
A330070K13Rik	RIKEN cDNA A330070K13 gene	2.31814
A330033J07Rik	RIKEN cDNA A330033J07 gene	2.31578
1700030C10Rik	RIKEN cDNA 1700030C10 gene	2.30256
Cldn20	claudin 20	2.27988
Tmem168	transmembrane protein 168	2.27636
Fibcd1	fibrinogen C domain containing 1	2.27025
Rnu73b	U73B small nuclear RNA	2.26151
Hist1h2af	histone cluster 1, H2af	2.26151
Mir191	microRNA 191	2.26151
Mir700	microRNA 700	2.26151
Atp6v0c-ps2	ATPase, H+ transporting, lysosomal V0 subunit C, pseudogene 2	2.26151
Snord68	small nucleolar RNA, C/D box 68	2.26151
Mir6966	microRNA 6966	2.26151
Mir7024	microRNA 7024	2.26151
Neurod4	neurogenic differentiation 4	2.26081
Tgm4	transglutaminase 4 (prostate)	2.25257
Nr4a2	nuclear receptor subfamily 4, group A, member 2	2.2517
Rpe65	retinal pigment epithelium 65	2.24768
Elmod2	ELMO/CED-12 domain containing 2	2.24477
Stxbp5l	syntaxin binding protein 5-like	2.24362
Strada	STE20-related kinase adaptor alpha	2.24341
Tmem253	transmembrane protein 253	2.23651
B3gnt6	UDP-GlcNAc:betaGal beta-1,3-N-acetylglucosaminyltransferase 6 (core 3 synthase)	2.23434
Meis2	Meis homeobox 2	2.2281
March10	membrane-associated ring finger (C3HC4) 10	2.21493
1700016K19Rik	RIKEN cDNA 1700016K19 gene	2.21145
3110070M22Rik	RIKEN cDNA 3110070M22 gene	2.2058
Myh2	myosin, heavy polypeptide 2, skeletal muscle, adult	2.20433
Cbln1	cerebellin 1 precursor protein	2.20027
Dhcr24	24-dehydrocholesterol reductase	2.19876
Cacng6	calcium channel, voltage-dependent, gamma subunit 6	2.19601
Sh3bp5	SH3-domain binding protein 5 (BTK-associated)	2.18185
Lrrc57	leucine rich repeat containing 57	2.17054
Cited1	Cbp/p300-interacting transactivator with Glu/Asp-rich carboxy-terminal domain 1	2.16828
Gdf1	growth differentiation factor 1	2.16036
Gm14486	predicted gene 14486	2.15937
D030047H15Rik	RIKEN cDNA D030047H15 gene	2.15937
Pygm	muscle glycogen phosphorylase	2.15671
Stoml3	stomatin (Epb7.2)-like 3	2.15239
Dmgdh	dimethylglycine dehydrogenase precursor	2.14665
Dgkk	diacylglycerol kinase kappa	2.14176
Siglece	sialic acid binding Ig-like lectin E	2.14016
Flt4	FMS-like tyrosine kinase 4	2.1398
Phospho1	phosphatase, orphan 1	2.13875
Atp2a1	ATPase, Ca++ transporting, cardiac muscle, fast twitch 1	2.13738
Tmem254a	transmembrane protein 254a	2.12889
Gm21586	predicted gene, 21586	2.1255
Egfl6	EGF-like-domain, multiple 6	2.11605
Gm26633	predicted gene, 26633	2.11126
Klhl30	kelch-like 30	2.10037
Insm2	insulinoma-associated 2	2.09997
Trim29	tripartite motif-containing 29	2.09997
Fam229a	family with sequence similarity 229, member A	2.09283
A230065H16Rik	RIKEN cDNA A230065H16 gene	2.08705
Ccdc184	coiled-coil domain containing 184	2.08502
Cngb1	cyclic nucleotide gated channel beta 1	2.07346
E030011O05Rik	RIKEN cDNA E030011O05 gene	2.06595
Ctnna3	catenin (cadherin associated protein), alpha 3	2.06459
A830052D11Rik	RIKEN cDNA A830052D11 gene	2.06459
Ermap	erythroblast membrane-associated protein	2.06323
Mir8101	microRNA 8101	2.06217
Acr	acrosin prepropeptide	2.06136
Ldhal6b	lactate dehydrogenase A-like 6B	2.05498
Kcng4	potassium voltage-gated channel, subfamily G, member 4	2.04686
Col10a1	collagen, type X, alpha 1	2.04083
Kirrel2	kin of IRRE like 2 (Drosophila)	2.03557
Kcnc3	potassium voltage gated channel, Shaw-related subfamily, member 3	2.0305
Th	tyrosine hydroxylase	2.02539
Olfr287	olfactory receptor 287	2.02131
Gm16287	predicted gene 16287	2.01955
Chrna1	cholinergic receptor, nicotinic, alpha polypeptide 1 (muscle)	2.01725
Tmem236	transmembrane protein 236	2.01725
2610318N02Rik	RIKEN cDNA 2610318N02 gene	2.01649
Olfr288	olfactory receptor 288	2.0116
Vgf	VGF nerve growth factor inducible	2.0071
Rpph1	ribonuclease P RNA component H1	2.00587
Trim63	tripartite motif-containing 63	2.00587
Tfap2b	transcription factor AP-2 beta	-2.00045
Slc2a10	solute carrier family 2 (facilitated glucose transporter), member 10	-2.00045
Fam129c	family with sequence similarity 129, member C	-2.00203
Zfp760	zinc finger protein 760	-2.00279
Pipox	pipecolic acid oxidase	-2.00326
Clic1	chloride intracellular channel 1	-2.00371
Chrnb1	cholinergic receptor, nicotinic, beta polypeptide 1 (muscle)	-2.00385
Col8a1	collagen, type VIII, alpha 1	-2.00541
Fmo2	flavin containing monooxygenase 2	-2.00624
Adamts9	a disintegrin-like and metallopeptidase (reprolysin type) with thrombospondin type 1 motif, 9	-2.0065
Leng8	leukocyte receptor cluster (LRC) member 8	-2.0093
Hapln2	hyaluronan and proteoglycan link protein 2	-2.01062
Mustn1	musculoskeletal, embryonic nuclear protein 1	-2.0107
Zfp930	zinc finger protein 930	-2.01072
Gm11992	predicted gene 11992	-2.01117
Slc4a11	solute carrier family 4, sodium bicarbonate transporter-like, member 11	-2.01221
Egr2	early growth response 2	-2.01312
Mki67	antigen identified by monoclonal antibody Ki 67	-2.01387
Col9a1	collagen, type IX, alpha 1	-2.01468
Mmp14	matrix metallopeptidase 14 (membrane-inserted)	-2.0154
Xlr4b	X-linked lymphocyte-regulated 4B	-2.01864
Gbp4	guanylate binding protein 4	-2.01925
Yes1	YES proto-oncogene 1, Src family tyrosine kinase	-2.01942
Apbb1ip	amyloid beta (A4) precursor protein-binding, family B, member 1 interacting protein	-2.01951
Igfbp5	insulin-like growth factor binding protein 5	-2.01989
Hhex	hematopoietically expressed homeobox	-2.0212
Naglu	alpha-N-acetylglucosaminidase (Sanfilippo disease IIIB)	-2.02346
Fam181a	family with sequence similarity 181, member A	-2.02368
E230029C05Rik	RIKEN cDNA E230029C05 gene	-2.02373
Laptm5	lysosomal-associated protein transmembrane 5	-2.0238
Trmt61b	tRNA methyltransferase 61B	-2.02435
Iqub	IQ motif and ubiquitin domain containing	-2.02475
4732416N19Rik	RIKEN cDNA 4732416N19 gene	-2.02479
Gm8989	predicted gene 8989	-2.02479
Zfp518a	zinc finger protein 518A	-2.02539
Gm10509	predicted gene 10509	-2.02626
Ctsk	cathepsin K	-2.02991
Kif11	kinesin family member 11	-2.03219
Ikzf2	IKAROS family zinc finger 2	-2.03222
Arsk	arylsulfatase K	-2.03316
Fn1	fibronectin 1	-2.03343
Prg4	proteoglycan 4 (megakaryocyte stimulating factor, articular superficial zone protein)	-2.03352
Gnmt	glycine N-methyltransferase	-2.03424
Mir3101	microRNA 3101	-2.03424
Col20a1	collagen, type XX, alpha 1	-2.03572
Slc25a24	solute carrier family 25 (mitochondrial carrier, phosphate carrier), member 24	-2.03574
Steap3	STEAP family member 3	-2.0381
Tap2	transporter 2, ATP-binding cassette, sub-family B (MDR/TAP)	-2.03862
1700084E18Rik	RIKEN cDNA 1700084E18 gene	-2.03903
Klf14	Kruppel-like factor 14	-2.03903
Ccdc108	coiled-coil domain containing 108	-2.03925
Ifitm2	interferon induced transmembrane protein 2	-2.04004
Sycp3	synaptonemal complex protein 3	-2.04193
Efcab11	EF-hand calcium binding domain 11	-2.04193
Spc25	SPC25, NDC80 kinetochore complex component, homolog (S. cerevisiae)	-2.04194
Liph	lipase, member H	-2.04501
4930578M01Rik	RIKEN cDNA 4930578M01 gene	-2.04526
Ccdc78	coiled-coil domain containing 78	-2.0463
Phex	phosphate regulating endopeptidase homolog, X-linked	-2.04777
Clec4a1	C-type lectin domain family 4, member a1	-2.04777
Gm11681	predicted gene 11681	-2.0483
Tmem37	transmembrane protein 37	-2.049
Lgals4	lectin, galactose binding, soluble 4	-2.0514
Phf20l1	PHD finger protein 20-like 1	-2.05154
Ptgr1	prostaglandin reductase 1	-2.05233
Primpol	primase and polymerase (DNA-directed)	-2.05542
Ptprv	protein tyrosine phosphatase, receptor type, V	-2.05962
Exoc3l4	exocyst complex component 3-like 4	-2.05962
Gins1	GINS complex subunit 1 (Psf1 homolog)	-2.06015
Adamts10	a disintegrin-like and metallopeptidase (reprolysin type) with thrombospondin type 1 motif, 10	-2.06027
Atp7b	ATPase, Cu++ transporting, beta polypeptide	-2.06045
Clec1a	C-type lectin domain family 1, member a	-2.06114
2210404O09Rik	RIKEN cDNA 2210404O09 gene	-2.06521
Mmp23	matrix metallopeptidase 23	-2.0653
4933406C10Rik	RIKEN cDNA 4933406C10 gene	-2.0653
Cdk6	cyclin-dependent kinase 6	-2.06658
Cpxm2	carboxypeptidase X 2 (M14 family)	-2.067
Rps27l	ribosomal protein S27-like	-2.06719
A330069E16Rik	RIKEN cDNA A330069E16 gene	-2.0675
Tmem220	transmembrane protein 220	-2.0677
Tpcn2	two pore segment channel 2	-2.06832
D3Ertd751e	DNA segment, Chr 3, ERATO Doi 751, expressed	-2.06855
Lcorl	ligand dependent nuclear receptor corepressor-like	-2.07052
Pram1	PML-RAR alpha-regulated adaptor molecule 1	-2.07299
Cenpa	centromere protein A	-2.07423
Parp10	poly (ADP-ribose) polymerase family, member 10	-2.07423
Mrgprf	MAS-related GPR, member F	-2.07491
5033404E19Rik	RIKEN cDNA 5033404E19 gene	-2.07594
Ifitm6	interferon induced transmembrane protein 6	-2.07594
Col15a1	collagen, type XV, alpha 1	-2.07685
Rinl	Ras and Rab interactor-like	-2.07694
Rab38	RAB38, member RAS oncogene family	-2.07995
Slc1a5	solute carrier family 1 (neutral amino acid transporter), member 5	-2.07998
Pla2g4a	phospholipase A2, group IVA (cytosolic, calcium-dependent)	-2.08071
Zfp386	zinc finger protein 386 (Kruppel-like)	-2.08167
Zfp52	zinc finger protein 52	-2.08256
Draxin	dorsal inhibitory axon guidance protein	-2.08296
Tifab	TRAF-interacting protein with forkhead-associated domain, family member B	-2.08348
Cept1	choline/ethanolaminephosphotransferase 1	-2.08506
2810433D01Rik	RIKEN cDNA 2810433D01 gene	-2.08545
Gm20219	predicted gene, 20219	-2.08545
Notch2	notch 2	-2.08563
8430408G22Rik	RIKEN cDNA 8430408G22 gene	-2.08673
Soat1	sterol O-acyltransferase 1	-2.08768
Dach2	dachshund 2 (Drosophila)	-2.08861
Lrrc17	leucine rich repeat containing 17	-2.08946
Eif2s3y	eukaryotic translation initiation factor 2, subunit 3, structural gene Y-linked	-2.09069
Malt1	MALT1 paracaspase	-2.09081
2810474O19Rik	RIKEN cDNA 2810474O19 gene	-2.09131
Gmip	Gem-interacting protein	-2.09131
Pdia5	protein disulfide isomerase associated 5	-2.09133
Fsbp	fibrinogen silencer binding protein	-2.09244
Gcnt1	glucosaminyl (N-acetyl) transferase 1, core 2	-2.09253
Fzd7	frizzled class receptor 7	-2.09366
Mss51	MSS51 mitochondrial translational activator	-2.09472
Adam32	a disintegrin and metallopeptidase domain 32	-2.09472
Ccdc18	coiled-coil domain containing 18	-2.09474
Wnt16	wingless-type MMTV integration site family, member 16	-2.09729
Cks2	CDC28 protein kinase regulatory subunit 2	-2.09878
Sh3bgrl	SH3-binding domain glutamic acid-rich protein like	-2.09894
Dclre1c	DNA cross-link repair 1C	-2.10023
Bub1b	BUB1B, mitotic checkpoint serine/threonine kinase	-2.10092
Nfam1	Nfat activating molecule with ITAM motif 1	-2.10138
Rcsd1	RCSD domain containing 1	-2.10199
Hsf2bp	heat shock transcription factor 2 binding protein	-2.10347
1700029I15Rik	RIKEN cDNA 1700029I15 gene	-2.10347
Mir3082	microRNA 3082	-2.10347
Pi4k2b	phosphatidylinositol 4-kinase type 2 beta	-2.10372
Capsl	calcyphosine-like	-2.10399
Sowahc	sosondowah ankyrin repeat domain family member C	-2.10447
Abcb1b	ATP-binding cassette, sub-family B (MDR/TAP), member 1B	-2.10554
Rbm46	RNA binding motif protein 46	-2.10641
Nid1	nidogen 1	-2.10798
Tgfbr3l	transforming growth factor, beta receptor III-like	-2.10818
Hpgd	hydroxyprostaglandin dehydrogenase 15 (NAD)	-2.10909
Prdm5	PR domain containing 5	-2.10953
Naaladl2	N-acetylated alpha-linked acidic dipeptidase-like 2	-2.1098
Hcar1	hydrocarboxylic acid receptor 1	-2.11037
Cox8b	cytochrome c oxidase subunit VIIIb	-2.11078
Gm5464	predicted gene 5464	-2.11078
E330020D12Rik	Riken cDNA E330020D12 gene	-2.11078
Mir6958	microRNA 6958	-2.11078
Litaf	LPS-induced TN factor	-2.11672
Gins2	GINS complex subunit 2 (Psf2 homolog)	-2.11863
Gjb2	gap junction protein, beta 2	-2.11989
Zfp51	zinc finger protein 51	-2.12073
Nfkb2	nuclear factor of kappa light polypeptide gene enhancer in B cells 2, p49/p100	-2.12221
Prorsd1	prolyl-tRNA synthetase domain containing 1	-2.12284
Smc2os	structural maintenance of chromosomes 2, opposite strand	-2.12316
Xlr3a	X-linked lymphocyte-regulated 3A	-2.12476
Dnajb13	DnaJ heat shock protein family (Hsp40) member B13	-2.12504
B3gnt8	UDP-GlcNAc:betaGal beta-1,3-N-acetylglucosaminyltransferase 8	-2.12795
Abi3	ABI gene family, member 3	-2.12903
Hist1h2bc	histone cluster 1, H2bc	-2.13203
Cyp4f17	cytochrome P450, family 4, subfamily f, polypeptide 17	-2.13327
Pcgf2	polycomb group ring finger 2	-2.1359
Ccdc122	coiled-coil domain containing 122	-2.13626
Zfp820	zinc finger protein 820	-2.13739
2010315B03Rik	RIKEN cDNA 2010315B03 gene	-2.13744
Efcab7	EF-hand calcium binding domain 7	-2.13815
Ctsl	cathepsin L	-2.13889
Cd46	CD46 antigen, complement regulatory protein	-2.1407
Adamts16	a disintegrin-like and metallopeptidase (reprolysin type) with thrombospondin type 1 motif, 16	-2.14137
Hhat	hedgehog acyltransferase	-2.14138
Tmc6	transmembrane channel-like gene family 6	-2.1418
Tead3	TEA domain family member 3	-2.14614
Gm17066	predicted gene 17066	-2.14681
Zfp758	zinc finger protein 758	-2.14694
9530091C08Rik	RIKEN cDNA 9530091C08 gene	-2.14746
Mir1898	microRNA 1898	-2.14746
Mir6990	microRNA 6990	-2.14746
Irak3	interleukin-1 receptor-associated kinase 3	-2.14966
9630013A20Rik	RIKEN cDNA 9630013A20 gene	-2.15183
Cbr2	carbonyl reductase 2	-2.15227
3110009E18Rik	RIKEN cDNA 3110009E18 gene	-2.15365
Zfp932	zinc finger protein 932	-2.15397
Gbp9	guanylate-binding protein 9	-2.15455
Loxl3	lysyl oxidase-like 3	-2.15463
5430402O13Rik	RIKEN cDNA 5430402O13 gene	-2.15491
Tcf24	transcription factor 24	-2.15491
9230112J17Rik	RIKEN cDNA 9230112J17 gene	-2.15491
Itpripl1	inositol 1,4,5-triphosphate receptor interacting protein-like 1	-2.15606
Zfp948	zinc finger protein 948	-2.15826
Col16a1	collagen, type XVI, alpha 1	-2.15846
Cmklr1	chemokine-like receptor 1	-2.15865
Samd9l	sterile alpha motif domain containing 9-like	-2.15898
Chst14	carbohydrate (N-acetylgalactosamine 4-0) sulfotransferase 14	-2.15916
Il16	interleukin 16	-2.15951
Cfap161	cilia and flagella associated protein 161	-2.16102
Zfp54	zinc finger protein 54	-2.16412
Gm3604	predicted gene 3604	-2.16412
Fam76b	family with sequence similarity 76, member B	-2.16545
Lyzl4	lysozyme-like 4	-2.16674
4930486L24Rik	RIKEN cDNA 4930486L24 gene	-2.16674
Mir3064	microRNA 3064	-2.16723
Hspb1	heat shock protein 1	-2.1688
Igf2bp2	insulin-like growth factor 2 mRNA binding protein 2	-2.1694
Agpat2	1-acylglycerol-3-phosphate O-acyltransferase 2 (lysophosphatidic acid acyltransferase, beta)	-2.16968
Il33	interleukin 33	-2.17046
Parp12	poly (ADP-ribose) polymerase family, member 12	-2.17144
Cep112	centrosomal protein 112	-2.17293
Gmnc	geminin coiled-coil domain containing	-2.17293
Ftx	Ftx transcript, Xist regulator (non-protein coding)	-2.1731
Lrrc9	leucine rich repeat containing 9	-2.17385
Eya2	EYA transcriptional coactivator and phosphatase 2	-2.17474
Akna	AT-hook transcription factor	-2.17491
Chtop	chromatin target of PRMT1	-2.17585
H2-M5	histocompatibility 2, M region locus 5	-2.17586
Ftl1	ferritin light polypeptide 1	-2.17651
Trp63	transformation related protein 63	-2.17657
Pnisr	PNN interacting serine/arginine-rich	-2.17856
Lgals9	lectin, galactose binding, soluble 9	-2.17863
E2f8	E2F transcription factor 8	-2.17897
6430531B16Rik	RIKEN cDNA 6430531B16 gene	-2.17951
Kif7	kinesin family member 7	-2.17962
Thbs2	thrombospondin 2	-2.18037
Mlf1	myeloid leukemia factor 1	-2.18291
Cd63	CD63 antigen	-2.18428
Scml2	sex comb on midleg-like 2 (Drosophila)	-2.18502
Cfap100	cilia and flagella associated protein 100	-2.18601
Mcm3	minichromosome maintenance complex component 3	-2.18827
5031414D18Rik	RIKEN cDNA 5031414D18 gene	-2.18846
Onecut2	one cut domain, family member 2	-2.18856
Ahnak	AHNAK nucleoprotein (desmoyokin)	-2.18889
Ctnnal1	catenin (cadherin associated protein), alpha-like 1	-2.18901
Fbln1	fibulin 1	-2.1919
Slc16a12	solute carrier family 16 (monocarboxylic acid transporters), member 12	-2.19194
1810011H11Rik	RIKEN cDNA 1810011H11 gene	-2.19407
Rarres2	retinoic acid receptor responder (tazarotene induced) 2	-2.19612
Itga8	integrin alpha 8	-2.19627
Tmed5	transmembrane p24 trafficking protein 5	-2.19657
Ltbp2	latent transforming growth factor beta binding protein 2	-2.19694
Casc1	cancer susceptibility candidate 1	-2.19789
Stard6	StAR-related lipid transfer (START) domain containing 6	-2.20098
Hist1h2bh	histone cluster 1, H2bh	-2.20123
Pld4	phospholipase D family, member 4	-2.20138
Ccdc88b	coiled-coil domain containing 88B	-2.20207
Hist1h2bn	histone cluster 1, H2bn	-2.20439
Sat1	spermidine/spermine N1-acetyl transferase 1	-2.20458
Nod2	nucleotide-binding oligomerization domain containing 2	-2.20479
Wsb1	WD repeat and SOCS box-containing 1	-2.2063
Vrk2	vaccinia related kinase 2	-2.20679
Fam60a	family with sequence similarity 60, member A	-2.20803
Glis3	GLIS family zinc finger 3	-2.20803
Galnt12	UDP-N-acetyl-alpha-D-galactosamine:polypeptide N-acetylgalactosaminyltransferase 12	-2.20903
Crabp2	cellular retinoic acid binding protein II	-2.20982
Marveld3	MARVEL (membrane-associating) domain containing 3	-2.21021
Hexb	hexosaminidase B	-2.21043
Slc2a4rg-ps	Slc2a4 regulator, pseudogene	-2.21341
Hspb8	heat shock protein 8	-2.21429
Dnaic2	dynein, axonemal, intermediate chain 2	-2.21558
Bicc1	BicC family RNA binding protein 1	-2.21661
Tgif2	TGFB-induced factor homeobox 2	-2.2168
Adamts18	a disintegrin-like and metallopeptidase (reprolysin type) with thrombospondin type 1 motif, 18	-2.217
Itgb7	integrin beta 7	-2.21876
Il10rb	interleukin 10 receptor, beta	-2.219
Cnn1	calponin 1	-2.21988
Firre	functional intergenic repeating RNA element	-2.22117
BC024139	cDNA sequence BC024139	-2.22148
Mir568	microRNA 568	-2.22314
Tep1	telomerase associated protein 1	-2.22327
Ssc5d	scavenger receptor cysteine rich family, 5 domains	-2.22338
Nt5dc1	5'-nucleotidase domain containing 1	-2.22586
Mfap2	microfibrillar-associated protein 2	-2.22625
Wdr86	WD repeat domain 86	-2.22904
Bmf	BCL2 modifying factor	-2.22909
Ucp2	uncoupling protein 2 (mitochondrial, proton carrier)	-2.23502
Slc26a2	solute carrier family 26 (sulfate transporter), member 2	-2.2353
Mettl20	methyltransferase like 20	-2.23544
Amy1	amylase 1, salivary	-2.23674
Eif2ak2	eukaryotic translation initiation factor 2-alpha kinase 2	-2.23974
S100a3	S100 calcium binding protein A3	-2.24061
Pgf	placental growth factor	-2.24153
1700020L24Rik	RIKEN cDNA 1700020L24 gene	-2.24155
Pabpc1l	poly(A) binding protein, cytoplasmic 1-like	-2.24155
B130024G19Rik	RIKEN cDNA B130024G19 gene	-2.24155
Six2	sine oculis-related homeobox 2	-2.24187
Alox5ap	arachidonate 5-lipoxygenase activating protein	-2.242
Adamtsl4	ADAMTS-like 4	-2.24331
Gm14434	predicted gene 14434	-2.24477
Rnf207	ring finger protein 207	-2.24504
Fbxo5	F-box protein 5	-2.24664
Col12a1	collagen, type XII, alpha 1	-2.24752
Ddx26b	DEAD/H (Asp-Glu-Ala-Asp/His) box polypeptide 26B	-2.24831
Gusb	glucuronidase, beta	-2.24928
Poln	DNA polymerase N	-2.25023
Rnpc3	RNA-binding region (RNP1, RRM) containing 3	-2.25113
Parp9	poly (ADP-ribose) polymerase family, member 9	-2.25149
Arhgap19	Rho GTPase activating protein 19	-2.2517
Gm29683	predicted gene, 29683	-2.25199
Pdgfrl	platelet-derived growth factor receptor-like	-2.25442
Grn	granulin	-2.25571
Hfe	hemochromatosis	-2.25741
Il10ra	interleukin 10 receptor, alpha	-2.25971
Gm5089	predicted gene 5089	-2.26158
Crygn	crystallin, gamma N	-2.26275
Itgad	integrin, alpha D	-2.26275
2210011C24Rik	RIKEN cDNA 2210011C24 gene	-2.26388
Fam65c	family with sequence similarity 65, member C	-2.266
Satb1	special AT-rich sequence binding protein 1	-2.26617
Mfsd7a	major facilitator superfamily domain containing 7A	-2.26692
Sept10	septin 10	-2.26938
Slc22a4	solute carrier family 22 (organic cation transporter), member 4	-2.27168
Gm10790	predicted gene 10790	-2.27263
Tbx18	T-box18	-2.27305
Was	Wiskott-Aldrich syndrome	-2.27534
Il15	interleukin 15	-2.27598
Myc	myelocytomatosis oncogene	-2.27776
Id3	inhibitor of DNA binding 3	-2.27803
4930581F22Rik	RIKEN cDNA 4930581F22 gene	-2.27866
Gm13152	predicted gene 13152	-2.27956
Ccdc173	coiled-coil domain containing 173	-2.28269
Med18	mediator complex subunit 18	-2.28426
9930012K11Rik	RIKEN cDNA 9930012K11 gene	-2.28493
Npl	N-acetylneuraminate pyruvate lyase	-2.28562
Hdx	highly divergent homeobox	-2.28723
Pter	phosphotriesterase related	-2.28812
Serpinh1	serine (or cysteine) peptidase inhibitor, clade H, member 1	-2.28817
Lmo2	LIM domain only 2	-2.28898
Gtse1	G two S phase expressed protein 1	-2.28944
Lacc1	laccase (multicopper oxidoreductase) domain containing 1	-2.29095
Slc22a2	solute carrier family 22 (organic cation transporter), member 2	-2.29194
9430037G07Rik	RIKEN cDNA 9430037G07 gene	-2.29283
Antxr2	anthrax toxin receptor 2	-2.29353
1810026B05Rik	RIKEN cDNA 1810026B05 gene	-2.29466
Zfp433	zinc finger protein 433	-2.29551
Hydin	HYDIN, axonemal central pair apparatus protein	-2.29719
Mmp2	matrix metallopeptidase 2	-2.30131
2810429I04Rik	RIKEN cDNA 2810429I04 gene	-2.30171
Enpep	glutamyl aminopeptidase	-2.30199
F12	coagulation factor XII (Hageman factor)	-2.30301
Ripply3	ripply transcriptional repressor 3	-2.30301
Snora81	small nucleolar RNA, H/ACA box 81	-2.30301
Gpx8	glutathione peroxidase 8 (putative)	-2.30342
Cd2ap	CD2-associated protein	-2.30422
Gm4532	predicted gene 4532	-2.30444
Cenpe	centromere protein E	-2.30608
Catip	ciliogenesis associated TTC17 interacting protein	-2.30619
Ttc14	tetratricopeptide repeat domain 14	-2.30624
Glb1l2	galactosidase, beta 1-like 2	-2.30683
Il13ra1	interleukin 13 receptor, alpha 1	-2.30736
Nxph2	neurexophilin 2	-2.30761
Crocc2	ciliary rootlet coiled-coil, rootletin family member 2	-2.30835
Maats1	MYCBP-associated, testis expressed 1	-2.30974
3632454L22Rik	RIKEN cDNA 3632454L22 gene	-2.31075
Gna14	guanine nucleotide binding protein, alpha 14	-2.31514
Cyth4	cytohesin 4	-2.31551
Cldn1	claudin 1	-2.31595
Hist1h2ap	histone cluster 1, H2ap	-2.31603
Snord57	small nucleolar RNA, C/D box 57	-2.31603
Mir6418	microRNA 6418	-2.31603
Mir7082	microRNA 7082	-2.31603
Mir7664	microRNA 7664	-2.31603
Mir6986	microRNA 6986	-2.31603
Mir7091	microRNA 7091	-2.31603
Nkx2-2os	NK2 homeobox 2, opposite strand	-2.31766
Cenpf	centromere protein F	-2.31832
Zfp960	zinc finger protein 960	-2.31834
Hmga2-ps1	high mobility group AT-hook 2, pseudogene 1	-2.31862
Ccdc114	coiled-coil domain containing 114	-2.323
Ap1g2	adaptor protein complex AP-1, gamma 2 subunit	-2.32409
Xlr3b	X-linked lymphocyte-regulated 3B	-2.32464
Kcne4	potassium voltage-gated channel, Isk-related subfamily, gene 4	-2.32524
Zc3h12d	zinc finger CCCH type containing 12D	-2.32571
Dock2	dedicator of cyto-kinesis 2	-2.32652
Mir7036	microRNA 7036	-2.32653
Plaur	plasminogen activator, urokinase receptor	-2.32729
Ang	angiogenin, ribonuclease, RNase A family, 5	-2.32852
Dyrk1a	dual-specificity tyrosine-(Y)-phosphorylation regulated kinase 1a	-2.32879
Sgms2	sphingomyelin synthase 2	-2.3305
Nusap1	nucleolar and spindle associated protein 1	-2.33137
Tm4sf1	transmembrane 4 superfamily member 1	-2.33317
Musk	muscle, skeletal, receptor tyrosine kinase	-2.33367
Rasal3	RAS protein activator like 3	-2.33483
Slc36a2	solute carrier family 36 (proton/amino acid symporter), member 2	-2.33613
Rcn3	reticulocalbin 3, EF-hand calcium binding domain	-2.33673
Ccdc40	coiled-coil domain containing 40	-2.33772
Palb2	partner and localizer of BRCA2	-2.33917
Efhc1	EF-hand domain (C-terminal) containing 1	-2.34026
Cmtm7	CKLF-like MARVEL transmembrane domain containing 7	-2.34131
Lpin3	lipin 3	-2.34273
Ect2l	epithelial cell transforming sequence 2 oncogene-like	-2.3428
Prrx1	paired related homeobox 1	-2.34437
Piezo2	piezo-type mechanosensitive ion channel component 2	-2.3461
Clk1	CDC-like kinase 1	-2.34626
Slfn5	schlafen 5	-2.3464
Slc16a9	solute carrier family 16 (monocarboxylic acid transporters), member 9	-2.34764
Lpxn	leupaxin	-2.34795
Ifit3b	interferon-induced protein with tetratricopeptide repeats 3B	-2.34894
Kcnmb1	potassium large conductance calcium-activated channel, subfamily M, beta member 1	-2.34929
Baiap2l1	BAI1-associated protein 2-like 1	-2.34929
En2	engrailed 2	-2.3522
Ttk	Ttk protein kinase	-2.3522
Camsap2	calmodulin regulated spectrin-associated protein family, member 2	-2.35369
Adgre1	adhesion G protein-coupled receptor E1	-2.35376
Adap2	ArfGAP with dual PH domains 2	-2.35412
Helz2	helicase with zinc finger 2, transcriptional coactivator	-2.35496
Gm6548	predicted gene 6548	-2.35557
Fam111a	family with sequence similarity 111, member A	-2.35593
Ccl24	chemokine (C-C motif) ligand 24	-2.35615
Birc3	baculoviral IAP repeat-containing 3	-2.35791
Rp2	retinitis pigmentosa 2 homolog	-2.3596
Aspn	asporin	-2.36019
Sash3	SAM and SH3 domain containing 3	-2.36045
P4ha3	procollagen-proline, 2-oxoglutarate 4-dioxygenase (proline 4-hydroxylase), alpha polypeptide III	-2.36116
A330076H08Rik	RIKEN cDNA A330076H08 gene	-2.36276
Pros1	protein S (alpha)	-2.36285
Foxl2	forkhead box L2	-2.36459
Bgn	biglycan	-2.3663
Slc12a7	solute carrier family 12, member 7	-2.36671
B4galt1	UDP-Gal:betaGlcNAc beta 1,4- galactosyltransferase, polypeptide 1	-2.36816
Ikzf1	IKAROS family zinc finger 1	-2.3693
Cenpk	centromere protein K	-2.37088
Ebi3	Epstein-Barr virus induced gene 3	-2.37176
Gstt2	glutathione S-transferase, theta 2	-2.37341
Pisd-ps1	phosphatidylserine decarboxylase, pseudogene 1	-2.37525
Cbln3	cerebellin 3 precursor protein	-2.37563
Lama1	laminin, alpha 1	-2.3758
Snx20	sorting nexin 20	-2.37824
Pisd-ps2	phosphatidylserine decarboxylase, pseudogene 2	-2.37959
Spata6	spermatogenesis associated 6	-2.38077
Insl5	insulin-like 5	-2.38296
Gstm2	glutathione S-transferase, mu 2	-2.38357
Apoe	apolipoprotein E	-2.38444
Tex14	testis expressed gene 14	-2.38626
Hist1h3i	histone cluster 1, H3i	-2.38626
Mir99a	microRNA 99a	-2.38626
Gm5523	predicted pseudogene 5523	-2.38626
Snord2	small nucleolar RNA, C/D box 2	-2.38626
Mir1966	microRNA 1966	-2.38626
Mir5625	microRNA 5625	-2.38626
Lpar4	lysophosphatidic acid receptor 4	-2.38733
Eqtn	equatorin, sperm acrosome associated	-2.38917
Abhd15	abhydrolase domain containing 15	-2.38952
Cela1	chymotrypsin-like elastase family, member 1	-2.39131
Tlr9	toll-like receptor 9	-2.39356
Eppk1	epiplakin 1	-2.3945
Etaa1os	Ewing tumor-associated antigen 1, opposite strand	-2.3945
Cfap43	cilia and flagella associated protein 43	-2.39555
Cdca3	cell division cycle associated 3	-2.39689
Aqp4	aquaporin 4	-2.39862
Rorc	RAR-related orphan receptor gamma	-2.39979
Ccdc33	coiled-coil domain containing 33	-2.40045
Fibin	fin bud initiation factor homolog (zebrafish)	-2.40062
Slc45a3	solute carrier family 45, member 3	-2.40342
Plin2	perilipin 2	-2.40465
Fam105a	family with sequence similarity 105, member A	-2.40731
Ttc12	tetratricopeptide repeat domain 12	-2.40785
Susd3	sushi domain containing 3	-2.4085
Phf19	PHD finger protein 19	-2.40981
Lrguk	leucine-rich repeats and guanylate kinase domain containing	-2.40981
Gypc	glycophorin C	-2.41008
Aif1	allograft inflammatory factor 1	-2.41093
C430049B03Rik	RIKEN cDNA C430049B03 gene	-2.41137
Gm11346	predicted gene 11346	-2.41137
Snord15b	small nucleolar RNA, C/D box 14B	-2.41137
Snord52	small nucleolar RNA, C/D box 52	-2.41137
Snord37	small nucleolar RNA, C/D box 37	-2.41137
Cdk2	cyclin-dependent kinase 2	-2.41249
Adrb2	adrenergic receptor, beta 2	-2.41299
Clec10a	C-type lectin domain family 10, member A	-2.41395
4930503L19Rik	RIKEN cDNA 4930503L19 gene	-2.41807
Stab1	stabilin 1	-2.41813
Slc26a4	solute carrier family 26, member 4	-2.42079
Hlx	H2.0-like homeobox	-2.42247
Fhod1	formin homology 2 domain containing 1	-2.42336
Myoz2	myozenin 2	-2.42427
Nxnl2	nucleoredoxin-like 2	-2.42427
Ces1d	carboxylesterase 1D	-2.42427
Bdh2	3-hydroxybutyrate dehydrogenase, type 2	-2.42525
Hck	hemopoietic cell kinase	-2.42723
Snord32a	small nucleolar RNA, C/D box 32A	-2.43212
Iyd	iodotyrosine deiodinase	-2.43212
1810062G17Rik	RIKEN cDNA 1810062G17 gene	-2.43212
9530026P05Rik	RIKEN cDNA 9530026P05 gene	-2.43212
Dab2	disabled 2, mitogen-responsive phosphoprotein	-2.43381
Tmem123	transmembrane protein 123	-2.4347
Bmx	BMX non-receptor tyrosine kinase	-2.43549
Fignl1	fidgetin-like 1	-2.43631
A130077B15Rik	RIKEN cDNA A130077B15 gene	-2.43631
Mirlet7d	microRNA let7d	-2.4374
Lrrn4cl	LRRN4 C-terminal like	-2.43747
Tnfsfm13	tumor necrosis factor (ligand) superfamily, membrane-bound member 13	-2.43789
Gsdmd	gasdermin D	-2.43829
Chek2	checkpoint kinase 2	-2.43968
Cdhr3	cadherin-related family member 3	-2.43968
Zfp229	zinc finger protein 229	-2.44097
Msn	moesin	-2.44266
Serinc4	serine incorporator 4	-2.44406
Lair1	leukocyte-associated Ig-like receptor 1	-2.44509
Lat	linker for activation of T cells	-2.44629
Zfhx2os	zinc finger homeobox 2, opposite strand	-2.44772
Uba7	ubiquitin-like modifier activating enzyme 7	-2.44973
C030023E24Rik	RIKEN cDNA C030023E24 gene	-2.44973
Oca2	oculocutaneous albinism II	-2.45078
Igf2os	insulin-like growth factor 2, opposite strand	-2.45078
Casp8	caspase 8	-2.45151
Zfp217	zinc finger protein 217	-2.45253
2410004P03Rik	RIKEN cDNA 2410004P03 gene	-2.45326
Neil3	nei like 3 (E. coli)	-2.45349
Ctsd	cathepsin D	-2.45473
Pde11a	phosphodiesterase 11A	-2.4553
Dusp27	dual specificity phosphatase 27 (putative)	-2.45659
Tmem252	transmembrane protein 252	-2.45809
Fam166b	family with sequence similarity 166, member B	-2.45854
Aebp1	AE binding protein 1	-2.45896
Pcolce	procollagen C-endopeptidase enhancer protein	-2.46202
Dok1	docking protein 1	-2.46273
Tor1aip2	torsin A interacting protein 2	-2.46871
Gm14391	predicted gene 14391	-2.47103
Nckap1l	NCK associated protein 1 like	-2.47232
Pdgfd	platelet-derived growth factor, D polypeptide	-2.47465
Ror1	receptor tyrosine kinase-like orphan receptor 1	-2.47571
Mlxipl	MLX interacting protein-like	-2.47725
Lrmp	lymphoid-restricted membrane protein	-2.47759
Lyl1	lymphoblastomic leukemia 1	-2.48548
Hgf	hepatocyte growth factor	-2.48643
Pik3cg	phosphoinositide-3-kinase, catalytic, gamma polypeptide	-2.48846
Gm19522	predicted gene, 19522	-2.49513
Adh1	alcohol dehydrogenase 1 (class I)	-2.49875
Pdzk1ip1	PDZK1 interacting protein 1	-2.49875
Ltb	lymphotoxin B	-2.50065
Dynlrb2	dynein light chain roadblock-type 2	-2.50084
Dnah7b	dynein, axonemal, heavy chain 7B	-2.50151
Pla2r1	phospholipase A2 receptor 1	-2.50277
Col4a6	collagen, type IV, alpha 6	-2.50337
Plscr4	phospholipid scramblase 4	-2.50369
Csf2ra	colony stimulating factor 2 receptor, alpha, low-affinity (granulocyte-macrophage)	-2.50815
Col18a1	collagen, type XVIII, alpha 1	-2.50816
Gbgt1	globoside alpha-1,3-N-acetylgalactosaminyltransferase 1	-2.51191
Phyhd1	phytanoyl-CoA dioxygenase domain containing 1	-2.51287
Wnt11	wingless-type MMTV integration site family, member 11	-2.51447
Irgm2	immunity-related GTPase family M member 2	-2.51592
Mlkl	mixed lineage kinase domain-like	-2.5186
Gm10941	predicted gene 10941	-2.5186
S1pr3	sphingosine-1-phosphate receptor 3	-2.51956
Cd86	CD86 antigen	-2.52081
Acpp	acid phosphatase, prostate	-2.52326
Tdgf1	teratocarcinoma-derived growth factor 1	-2.5257
Tnfrsf10b	tumor necrosis factor receptor superfamily, member 10b	-2.5257
Col27a1	collagen, type XXVII, alpha 1	-2.52571
Itga5	integrin alpha 5 (fibronectin receptor alpha)	-2.52598
Itprip	inositol 1,4,5-triphosphate receptor interacting protein	-2.52928
H2-Q2	histocompatibility 2, Q region locus 2	-2.52932
1500017E21Rik	RIKEN cDNA 1500017E21 gene	-2.52932
Ppp1r36	protein phosphatase 1, regulatory subunit 36	-2.5311
Perp	PERP, TP53 apoptosis effector	-2.5313
Mms22l	MMS22-like, DNA repair protein	-2.53182
H2-Oa	histocompatibility 2, O region alpha locus	-2.53601
Sept1	septin 1	-2.53601
Oxgr1	oxoglutarate (alpha-ketoglutarate) receptor 1	-2.53644
Rhoh	ras homolog family member H	-2.53757
Gm5431	predicted gene 5431	-2.53789
Ppl	periplakin	-2.54339
Sh3tc1	SH3 domain and tetratricopeptide repeats 1	-2.54374
Hmmr	hyaluronan mediated motility receptor (RHAMM)	-2.5462
Dapp1	dual adaptor for phosphotyrosine and 3-phosphoinositides 1	-2.54652
Clec2d	C-type lectin domain family 2, member d	-2.54957
Csf1	colony stimulating factor 1 (macrophage)	-2.55225
Odf3b	outer dense fiber of sperm tails 3B	-2.55329
Srgn	serglycin	-2.55479
Gulp1	GULP, engulfment adaptor PTB domain containing 1	-2.55958
Ccr5	chemokine (C-C motif) receptor 5	-2.56019
Abcc3	ATP-binding cassette, sub-family C (CFTR/MRP), member 3	-2.56019
Pdpn	podoplanin	-2.56224
Prpf39	pre-mRNA processing factor 39	-2.56301
Gm14827	predicted gene 14827	-2.5632
Ifitm3	interferon induced transmembrane protein 3	-2.56543
Nfatc4	nuclear factor of activated T cells, cytoplasmic, calcineurin dependent 4	-2.56575
Pbk	PDZ binding kinase	-2.56772
Cebpa	CCAAT/enhancer binding protein (C/EBP), alpha	-2.56866
Tnfrsf11b	tumor necrosis factor receptor superfamily, member 11b (osteoprotegerin)	-2.569
Spag17	sperm associated antigen 17	-2.56913
Tram2	translocating chain-associating membrane protein 2	-2.57179
Smc4	structural maintenance of chromosomes 4	-2.57661
Emp3	epithelial membrane protein 3	-2.578
6720489N17Rik	RIKEN cDNA 6720489N17 gene	-2.58078
Adamts12	a disintegrin-like and metallopeptidase (reprolysin type) with thrombospondin type 1 motif, 12	-2.58392
Bvht	braveheart long non-coding RNA	-2.58392
Phldb2	pleckstrin homology like domain, family B, member 2	-2.58641
Gm10069	predicted gene 10069	-2.58642
Fcrls	Fc receptor-like S, scavenger receptor	-2.58776
Ccnb1	cyclin B1	-2.59102
Itga10	integrin, alpha 10	-2.59277
Fgd2	FYVE, RhoGEF and PH domain containing 2	-2.59681
Krtcap3	keratinocyte associated protein 3	-2.5974
Apobr	apolipoprotein B receptor	-2.59859
Uhrf1	ubiquitin-like, containing PHD and RING finger domains, 1	-2.60059
Fzd5	frizzled class receptor 5	-2.60226
Ppp1r32	protein phosphatase 1, regulatory subunit 32	-2.60335
Il7r	interleukin 7 receptor	-2.60828
Zfp97	zinc finger protein 97	-2.61246
4933413G19Rik	RIKEN cDNA 4933413G19 gene	-2.61656
Gpr34	G protein-coupled receptor 34	-2.61912
Rrm2	ribonucleotide reductase M2	-2.62266
Gpr20	G protein-coupled receptor 20	-2.624
Scarna13	small Cajal body-specific RNA 1	-2.624
Card9	caspase recruitment domain family, member 9	-2.62589
Mtm1	X-linked myotubular myopathy gene 1	-2.62605
Nkx2-9	NK2 homeobox 9	-2.62658
Slc4a5	solute carrier family 4, sodium bicarbonate cotransporter, member 5	-2.62821
Nfe2l2	nuclear factor, erythroid derived 2, like 2	-2.63135
H2-M3	histocompatibility 2, M region locus 3	-2.63339
Gm867	predicted gene 867	-2.63386
Ifit3	interferon-induced protein with tetratricopeptide repeats 3	-2.63508
Gimap9	GTPase, IMAP family member 9	-2.63671
Hk2	hexokinase 2	-2.63751
Wdfy4	WD repeat and FYVE domain containing 4	-2.6439
Lpar6	lysophosphatidic acid receptor 6	-2.64553
Kif18b	kinesin family member 18B	-2.64657
Baz1a	bromodomain adjacent to zinc finger domain 1A	-2.6499
Hpn	hepsin	-2.65114
Lars2	leucyl-tRNA synthetase, mitochondrial	-2.65511
Slfn2	schlafen 2	-2.65592
Adam1b	a disintegrin and metallopeptidase domain 1b	-2.66042
Bmp5	bone morphogenetic protein 5	-2.6681
Gdpd2	glycerophosphodiester phosphodiesterase domain containing 2	-2.66988
Mamdc4	MAM domain containing 4	-2.67067
Ncf1	neutrophil cytosolic factor 1	-2.67086
Mpzl2	myelin protein zero-like 2	-2.67119
Bspry	B-box and SPRY domain containing	-2.67132
Plod2	procollagen lysine, 2-oxoglutarate 5-dioxygenase 2	-2.6722
Drc7	dynein regulatory complex subunit 7	-2.67225
Saxo2	stablizer of axonemal microtubules 2	-2.67422
Snhg9	small nucleolar RNA host gene 9	-2.67527
Cd14	CD14 antigen	-2.67866
Hells	helicase, lymphoid specific	-2.67926
Col7a1	collagen, type VII, alpha 1	-2.68557
Ptpn7	protein tyrosine phosphatase, non-receptor type 7	-2.68682
Colec12	collectin sub-family member 12	-2.68686
Tshr	thyroid stimulating hormone receptor	-2.68758
Chaf1b	chromatin assembly factor 1, subunit B (p60)	-2.6923
Slc14a1	solute carrier family 14 (urea transporter), member 1	-2.69603
Tal1	T cell acute lymphocytic leukemia 1	-2.69747
Anpep	alanyl (membrane) aminopeptidase	-2.69924
Twist1	twist basic helix-loop-helix transcription factor 1	-2.70445
Gucy2c	guanylate cyclase 2c	-2.70617
Gm6787	predicted gene 6787	-2.70617
Lzts3	leucine zipper, putative tumor suppressor family member 3	-2.70739
Pik3ap1	phosphoinositide-3-kinase adaptor protein 1	-2.7085
Tcp11	t-complex protein 11	-2.70908
Strn3	striatin, calmodulin binding protein 3	-2.71165
Clec5a	C-type lectin domain family 5, member a	-2.71339
Col6a1	collagen, type VI, alpha 1	-2.71379
Gm15328	predicted gene 15328	-2.71508
Nid2	nidogen 2	-2.71568
Lcp2	lymphocyte cytosolic protein 2	-2.71715
Thbs4	thrombospondin 4	-2.71882
Aspm	asp (abnormal spindle)-like, microcephaly associated (Drosophila)	-2.71953
P2ry1	purinergic receptor P2Y, G-protein coupled 1	-2.72035
Mpp4	membrane protein, palmitoylated 4 (MAGUK p55 subfamily member 4)	-2.72206
Fam47e	family with sequence similarity 47, member E	-2.72206
Ildr1	immunoglobulin-like domain containing receptor 1	-2.72527
Tgfbr2	transforming growth factor, beta receptor II	-2.72936
Slc22a18	solute carrier family 22 (organic cation transporter), member 18	-2.73101
Arhgap4	Rho GTPase activating protein 4	-2.73103
Casp1	caspase 1	-2.73148
Col5a1	collagen, type V, alpha 1	-2.73852
Rab39	RAB39, member RAS oncogene family	-2.74045
Aim1l	absent in melanoma 1-like	-2.74066
C2	complement component 2 (within H-2S)	-2.74526
Folr1	folate receptor 1 (adult)	-2.74639
Tlr7	toll-like receptor 7	-2.75127
Hist1h1d	histone cluster 1, H1d	-2.75346
Havcr2	hepatitis A virus cellular receptor 2	-2.75394
Sostdc1	sclerostin domain containing 1	-2.75842
Asap3	ArfGAP with SH3 domain, ankyrin repeat and PH domain 3	-2.76386
Muc1	mucin 1, transmembrane	-2.76418
Clcn3	chloride channel, voltage-sensitive 3	-2.76443
Col4a5	collagen, type IV, alpha 5	-2.76557
Top2a	topoisomerase (DNA) II alpha	-2.76721
Ada	adenosine deaminase	-2.77268
Tnfrsf25	tumor necrosis factor receptor superfamily, member 25	-2.77268
4833427G06Rik	RIKEN cDNA 4833427G06 gene	-2.77301
9630028B13Rik	RIKEN cDNA 9630028B13 gene	-2.77301
Slc39a2	solute carrier family 39 (zinc transporter), member 2	-2.77399
Ifih1	interferon induced with helicase C domain 1	-2.77581
Slc25a21	solute carrier family 25 (mitochondrial oxodicarboxylate carrier), member 21	-2.77715
Cfp	complement factor properdin	-2.77777
Arhgap30	Rho GTPase activating protein 30	-2.77834
Cd79b	CD79B antigen	-2.77962
Inmt	indolethylamine N-methyltransferase	-2.78108
Bmp4	bone morphogenetic protein 4	-2.78132
Lcp1	lymphocyte cytosolic protein 1	-2.78234
Adam33	a disintegrin and metallopeptidase domain 33	-2.78421
Gm5086	predicted gene 5086	-2.7861
Rsc1a1	regulatory solute carrier protein, family 1, member 1	-2.78629
Irs3	insulin receptor substrate 3	-2.78768
Tead4	TEA domain family member 4	-2.78768
Tmprss9	transmembrane protease, serine 9	-2.78768
1700007L15Rik	RIKEN cDNA 1700007L15 gene	-2.78987
Armc3	armadillo repeat containing 3	-2.7921
Snhg15	small nucleolar RNA host gene 15	-2.7921
Gas2l3	growth arrest-specific 2 like 3	-2.79251
Mx2	MX dynamin-like GTPase 2	-2.79587
Zgrf1	zinc finger, GRF-type containing 1	-2.79883
Depdc1b	DEP domain containing 1B	-2.80196
1810034E14Rik	RIKEN cDNA 1810034E14 gene	-2.80687
Il3ra	interleukin 3 receptor, alpha chain	-2.80804
Parp3	poly (ADP-ribose) polymerase family, member 3	-2.80848
Mdfic	MyoD family inhibitor domain containing	-2.81662
Tnfrsf1b	tumor necrosis factor receptor superfamily, member 1b	-2.81691
Hacd4	3-hydroxyacyl-CoA dehydratase 4	-2.81703
Casq1	calsequestrin 1	-2.81812
1810011O10Rik	RIKEN cDNA 1810011O10 gene	-2.8186
Catsperd	catsper channel auxiliary subunit delta	-2.81916
Efhb	EF hand domain family, member B	-2.81916
Lax1	lymphocyte transmembrane adaptor 1	-2.81916
Dsc3	desmocollin 3	-2.82379
Trip13	thyroid hormone receptor interactor 13	-2.82379
Zc3hav1	zinc finger CCCH type, antiviral 1	-2.82618
Txnip	thioredoxin interacting protein	-2.8368
Gbp3	guanylate binding protein 3	-2.83917
Tacstd2	tumor-associated calcium signal transducer 2	-2.84056
Vmn2r57	vomeronasal 2, receptor 57	-2.84056
Thsd4	thrombospondin, type I, domain containing 4	-2.84117
Slc35d2	solute carrier family 35, member D2	-2.84568
Cd37	CD37 antigen	-2.85045
Spef2	sperm flagellar 2	-2.85062
Cd24a	CD24a antigen	-2.85104
C5ar1	complement component 5a receptor 1	-2.85364
Cd1d1	CD1d1 antigen	-2.85368
Icosl	icos ligand	-2.85594
Nat2	N-acetyltransferase 2 (arylamine N-acetyltransferase)	-2.85838
Mrc1	mannose receptor, C type 1	-2.8598
Pilra	paired immunoglobin-like type 2 receptor alpha	-2.86017
Gem	GTP binding protein (gene overexpressed in skeletal muscle)	-2.86369
Nuf2	NUF2, NDC80 kinetochore complex component	-2.87092
Slc38a6	solute carrier family 38, member 6	-2.87175
Hmox1	heme oxygenase 1	-2.87586
Hmgb2	high mobility group box 2	-2.876
Ccna2	cyclin A2	-2.87773
Gpsm3	G-protein signalling modulator 3 (AGS3-like, C. elegans)	-2.87896
Hist1h4h	histone cluster 1, H4h	-2.87977
6430411K18Rik	RIKEN cDNA 6430411K18 gen	-2.88024
Iqgap3	IQ motif containing GTPase activating protein 3	-2.88024
Cp	ceruloplasmin	-2.88599
Lrrc25	leucine rich repeat containing 25	-2.88642
Ttll8	tubulin tyrosine ligase-like family, member 8	-2.88834
Spi1	spleen focus forming virus (SFFV) proviral integration oncogene	-2.88906
Lrrc74b	leucine rich repeat containing 74B	-2.89036
Ptprcap	protein tyrosine phosphatase, receptor type, C polypeptide-associated protein	-2.89308
Snai2	snail family zinc finger 2	-2.90045
Smad6	SMAD family member 6	-2.9026
Olfr920	olfactory receptor 920	-2.90317
Unc13d	unc-13 homolog D (C. elegans)	-2.90597
Socs3	suppressor of cytokine signaling 3	-2.91201
Axdnd1	axonemal dynein light chain domain containing 1	-2.91413
Slc22a13b-ps	solute carrier family 22 (organic cation transporter), member 13b, pseudogene	-2.91413
Snora52	small nucleolar RNA, H/ACA box 52	-2.91413
Plekhg4	pleckstrin homology domain containing, family G (with RhoGef domain) member 4	-2.91479
Dach1	dachshund 1 (Drosophila)	-2.91593
Cntd1	cyclin N-terminal domain containing 1	-2.91837
Dennd2d	DENN/MADD domain containing 2D	-2.91837
Tnfsf13b	tumor necrosis factor (ligand) superfamily, member 13b	-2.91973
Snai1	snail family zinc finger 1	-2.9235
Cdca2	cell division cycle associated 2	-2.9235
Rapsn	receptor-associated protein of the synapse	-2.9348
A330049N07Rik	RIKEN cDNA A330049N07 gene	-2.9348
Gm14005	predicted gene 14005	-2.93547
4833419F23Rik	RIKEN cDNA 4833419F23 gene	-2.93918
Acnat1	acyl-coenzyme A amino acid N-acyltransferase 1	-2.93918
Tecrl	trans-2,3-enoyl-CoA reductase-like	-2.93918
Gm3417	predicted gene 3417	-2.93918
AA413626	expressed sequence AA413626	-2.93918
DQ267100	snoRNA DQ267100	-2.93918
Klk6	kallikrein related-peptidase 6	-2.94015
Zfp36	zinc finger protein 36	-2.94537
Pla2g4c	phospholipase A2, group IVC (cytosolic, calcium-independent)	-2.95034
Dna2	DNA replication helicase/nuclease 2	-2.9524
Lpar5	lysophosphatidic acid receptor 5	-2.95299
Mapk15	mitogen-activated protein kinase 15	-2.95581
Zfp808	zinc finger protein 80	-2.96241
Nfkbiz	nuclear factor of kappa light polypeptide gene enhancer in B cells inhibitor, zeta	-2.96851
Trim14	tripartite motif-containing 14	-2.96942
I830077J02Rik	RIKEN cDNA I830077J02 gene	-2.97154
Cd33	CD33 antigen	-2.9749
Mcemp1	mast cell expressed membrane protein 1	-2.97495
Mansc4	MANSC domain containing 4	-2.97495
Rnase4	ribonuclease, RNase A family 4	-2.97547
T2	brachyury 2	-2.97658
Ckap2	cytoskeleton associated protein 2	-2.9804
Fermt3	fermitin family member 3	-2.98072
Ccdc171	coiled-coil domain containing 171	-2.98526
Hepacam2	HEPACAM family member 2	-2.98716
Mxra8	matrix-remodelling associated 8	-2.98807
Slc47a1	solute carrier family 47, member 1	-2.99135
Esm1	endothelial cell-specific molecule 1	-2.99333
Espl1	extra spindle pole bodies 1, separase	-2.99526
Spag8	sperm associated antigen 8	-2.99526
Ccdc89	coiled-coil domain containing 89	-3.00131
Cfap61	cilia and flagella associated protein 61	-3.0167
Tcirg1	T cell, immune regulator 1, ATPase, H+ transporting, lysosomal V0 protein A3	-3.01898
Crip1	cysteine-rich protein 1 (intestinal)	-3.02119
Ctsc	cathepsin C	-3.02202
Styxl1	serine/threonine/tyrosine interacting-like 1	-3.02348
Pyroxd2	pyridine nucleotide-disulphide oxidoreductase domain 2	-3.02407
Mgst1	microsomal glutathione S-transferase 1	-3.0318
Cebpd	CCAAT/enhancer binding protein (C/EBP), delta	-3.04148
Dennd1c	DENN/MADD domain containing 1C	-3.04449
Osr1	odd-skipped related 1 (Drosophila)	-3.05035
Ddias	DNA damage-induced apoptosis suppressor	-3.05133
Kif18a	kinesin family member 18A	-3.05133
Ms4a6b	membrane-spanning 4-domains, subfamily A, member 6B	-3.05315
Glipr1	GLI pathogenesis-related 1 (glioma)	-3.05315
Mir221	microRNA 221	-3.05427
Mir377	microRNA 377	-3.05427
Snord45b	small nucleolar RNA, C/D box 45B	-3.05427
Mir7028	microRNA 7028	-3.05427
Mir7046	microRNA 7046	-3.05427
Gm13157	predicted gene 13157	-3.05719
Sspo	SCO-spondin	-3.06025
Gbp7	guanylate binding protein 7	-3.06114
Tnfsf10	tumor necrosis factor (ligand) superfamily, member 10	-3.06404
Tspo	translocator protein	-3.06649
Tmem71	transmembrane protein 71	-3.06885
Tex15	testis expressed gene 15	-3.07079
1700029J07Rik	RIKEN cDNA 1700029J07 gene	-3.07394
2310001H17Rik	RIKEN cDNA 2310001H17 gene	-3.0748
Misp	mitotic spindle positioning	-3.0748
Ticrr	TOPBP1-interacting checkpoint and replication regulator	-3.07731
Lrrc36	leucine rich repeat containing 36	-3.07913
Ifitm1	interferon induced transmembrane protein 1	-3.08211
Pf4	platelet factor 4	-3.08514
Ccdc153	coiled-coil domain containing 153	-3.08706
Cybrd1	cytochrome b reductase 1	-3.08808
Pou2f3	POU domain, class 2, transcription factor 3	-3.09793
S100a11	S100 calcium binding protein A11	-3.10067
Serpinb6b	serine (or cysteine) peptidase inhibitor, clade B, member 6b	-3.10667
Cyp2r1	cytochrome P450, family 2, subfamily r, polypeptide 1	-3.10933
Emilin1	elastin microfibril interfacer 1	-3.11019
Themis2	thymocyte selection associated family member 2	-3.12012
Pqlc3	PQ loop repeat containing	-3.12054
Rhbdf2	rhomboid 5 homolog 2	-3.1233
B2m	beta-2 microglobulin	-3.12573
4933408B17Rik	RIKEN cDNA 4933408B17 gene	-3.12897
Mboat1	membrane bound O-acyltransferase domain containing 1	-3.1314
Dse	dermatan sulfate epimerase	-3.13141
Has2	hyaluronan synthase 2	-3.13416
Shcbp1l	Shc SH2-domain binding protein 1-like	-3.14558
Carmn	cardiac mesoderm enhancer-associated non-coding RNA	-3.15121
Mrc2	mannose receptor, C type 2	-3.15145
Chrm5	cholinergic receptor, muscarinic 5	-3.15286
Ppp1r3b	protein phosphatase 1, regulatory (inhibitor) subunit 3B	-3.15471
Mir1906-1	microRNA 1906-1	-3.16389
Mir1906-2	microRNA 1906-2	-3.16389
Dio3os	deiodinase, iodothyronine type III, opposite strand	-3.16746
Gm3414	predicted gene 3414	-3.17299
S100a6	S100 calcium binding protein A6 (calcyclin)	-3.1781
Fes	feline sarcoma oncogene	-3.18295
Knstrn	kinetochore-localized astrin/SPAG5 binding	-3.18548
Anxa9	annexin A9	-3.19238
BC028528	cDNA sequence BC028528	-3.19271
F13a1	coagulation factor XIII, A1 subunit	-3.19402
Ctsz	cathepsin Z	-3.19755
St14	suppression of tumorigenicity 14 (colon carcinoma)	-3.20048
Clec4a3	C-type lectin domain family 4, member a3	-3.2014
Zfp677	zinc finger protein 677	-3.20212
Snord34	small nucleolar RNA, C/D box 34	-3.20308
Calml4	calmodulin-like 4	-3.20369
Nuak2	NUAK family, SNF1-like kinase, 2	-3.20555
Rtp4	receptor transporter protein 4	-3.20678
Aldh1l2	aldehyde dehydrogenase 1 family, member L2	-3.2116
Lat2	linker for activation of T cells family, member 2	-3.21712
Myof	myoferlin	-3.21824
Snord99	small nucleolar RNA, C/D box 99	-3.22322
Irf5	interferon regulatory factor 5	-3.22582
Ccrl2	chemokine (C-C motif) receptor-like 2	-3.2267
Foxj1	forkhead box J1	-3.2318
Foxd2	forkhead box D2	-3.23223
Klb	klotho beta	-3.23547
Krt18	keratin 18	-3.24291
2810417H13Rik	RIKEN cDNA 2810417H13 gene	-3.24941
Ttc21a	tetratricopeptide repeat domain 21A	-3.25004
Tmem212	transmembrane protein 212	-3.25076
Trim34a	tripartite motif-containing 34A	-3.25103
Arhgap45	Rho GTPase activating protein 45	-3.2538
Nlrc3	NLR family, CARD domain containing 3	-3.25411
E030019B13Rik	RIKEN cDNA E030019B13 gene	-3.2576
A4galt	alpha 1,4-galactosyltransferase	-3.25953
Ncapg	non-SMC condensin I complex, subunit G	-3.26762
Lrriq1	leucine-rich repeats and IQ motif containing 1	-3.26762
Arhgef33	Rho guanine nucleotide exchange factor (GEF) 33	-3.26762
Trim12c	tripartite motif-containing 12C	-3.26763
2610305D13Rik	RIKEN cDNA 2610305D13 gene	-3.26989
Cfap126	cilia and flagella associated protein 126	-3.27151
Ugt1a6a	UDP glucuronosyltransferase 1 family, polypeptide A6A	-3.27454
Tlr6	toll-like receptor 6	-3.27854
Mns1	meiosis-specific nuclear structural protein 1	-3.27912
Lrrc23	leucine rich repeat containing 23	-3.28204
C1ra	complement component 1, r subcomponent A	-3.28982
Adamts2	a disintegrin-like and metallopeptidase (reprolysin type) with thrombospondin type 1 motif, 2	-3.29149
H2-DMb1	histocompatibility 2, class II, locus Mb1	-3.29687
Cdk1	cyclin-dependent kinase 1	-3.3003
Trim12a	tripartite motif-containing 12A	-3.30408
Ywhaz	tyrosine 3-monooxygenase/tryptophan 5-monooxygenase activation protein, zeta polypeptide	-3.30556
Tlr13	toll-like receptor 13	-3.30606
Gbp5	guanylate binding protein 5	-3.30622
Mmp19	matrix metallopeptidase 19	-3.30893
Rac2	RAS-related C3 botulinum substrate 2	-3.31368
C1qb	complement component 1, q subcomponent, beta polypeptide	-3.31825
Tctex1d4	Tctex1 domain containing 4	-3.32087
Postn	periostin, osteoblast specific factor	-3.32322
4930577N17Rik	RIKEN cDNA 4930577N17 gene	-3.32887
2310040G24Rik	RIKEN cDNA 2310040G24 gene	-3.34104
Il1rl1	interleukin 1 receptor-like 1	-3.34163
B230208H11Rik	RIKEN cDNA B230208H11 gene	-3.34163
Ak7	adenylate kinase 7	-3.34688
Itgb2	integrin beta 2	-3.34888
Traf1	TNF receptor-associated factor 1	-3.35453
Scara5	scavenger receptor class A, member 5	-3.35916
P2ry6	pyrimidinergic receptor P2Y, G-protein coupled, 6	-3.36134
C230072F16Rik	RIKEN cDNA C230072F16 gene	-3.36236
Kl	klotho	-3.36958
Unc93b1	unc-93 homolog B1 (C. elegans)	-3.37333
Ccl19	chemokine (C-C motif) ligand 19	-3.37465
Il21r	interleukin 21 receptor	-3.37495
Gm7854	predicted gene 7854	-3.37811
Tnfaip8l2	tumor necrosis factor, alpha-induced protein 8-like 2	-3.38234
Il2rb	interleukin 2 receptor, beta chain	-3.38404
Ncf2	neutrophil cytosolic factor 2	-3.38457
Slamf6	SLAM family member 6	-3.38568
Col14a1	collagen, type XIV, alpha 1	-3.39423
Usp18	ubiquitin specific peptidase 18	-3.39453
Slc43a1	solute carrier family 43, member 1	-3.39614
Snora41	small nucleolar RNA, H/ACA box 41	-3.39614
Serpina3g	serine (or cysteine) peptidase inhibitor, clade A, member 3G	-3.40024
A630089N07Rik	RIKEN cDNA A630089N07 gene	-3.41053
Kcnj13	potassium inwardly-rectifying channel, subfamily J, member 13	-3.43153
Lgals3bp	lectin, galactoside-binding, soluble, 3 binding protein	-3.43204
Msx1	msh homeobox 1	-3.43726
Rab7b	RAB7B, member RAS oncogene family	-3.4408
Arpc1b	actin related protein 2/3 complex, subunit 1B	-3.44445
Card14	caspase recruitment domain family, member 14	-3.44689
Oas1b	2'-5' oligoadenylate synthetase 1B	-3.45417
Prn	prion protein gene complex	-3.45663
Vav1	vav 1 oncogene	-3.45943
Cyr61	cysteine rich protein 61	-3.46435
Plek	pleckstrin	-3.46443
Cldn3	claudin 3	-3.46699
4930455G09Rik	RIKEN cDNA 4930455G09 gene	-3.46699
Gdpd3	glycerophosphodiester phosphodiesterase domain containing 3	-3.46806
Apobec3	apolipoprotein B mRNA editing enzyme, catalytic polypeptide 3	-3.46839
Elf4	E74-like factor 4 (ets domain transcription factor)	-3.47233
Dnase1l1	deoxyribonuclease 1-like 1	-3.47507
Gsg2	germ cell-specific gene 2	-3.48063
Trpm1	transient receptor potential cation channel, subfamily M, member 1	-3.48063
Sp100	nuclear antigen Sp100	-3.48559
D17H6S56E-5	DNA segment, Chr 17, human D6S56E 5	-3.48662
Gbp2	guanylate binding protein 2	-3.49198
Hk3	hexokinase 3	-3.49257
Pawr	PRKC, apoptosis, WT1, regulator	-3.49674
Icam1	intercellular adhesion molecule 1	-3.50725
Slc7a7	solute carrier family 7 (cationic amino acid transporter, y+ system), member 7	-3.51131
Col4a3	collagen, type IV, alpha 3	-3.51249
Igf1	insulin-like growth factor 1	-3.51796
Traf3ip3	TRAF3 interacting protein 3	-3.52284
Plscr1	phospholipid scramblase 1	-3.52331
H2-K2	histocompatibility 2, K region locus 2	-3.52521
Runx1	runt related transcription factor 1	-3.52954
Sned1	sushi, nidogen and EGF-like domains 1	-3.53776
Samsn1	SAM domain, SH3 domain and nuclear localization signals, 1	-3.54046
Shroom2	shroom family member 2	-3.55048
Smpx	small muscle protein, X-linked	-3.55271
A330008L17Rik	RIKEN cDNA A330008L17 gene	-3.55271
Hist1h4a	histone cluster 1, H4a	-3.55271
Mir7-1	microRNA 7-1	-3.55271
Mir421	microRNA 421	-3.55271
Snord89	small nucleolar RNA, C/D box 89	-3.55271
Trim21	tripartite motif-containing 21	-3.55586
Zbbx	zinc finger, B-box domain containing	-3.55682
Clcf1	cardiotrophin-like cytokine factor 1	-3.55925
Cfap46	cilia and flagella associated protein 46	-3.56815
Dkk2	dickkopf WNT signaling pathway inhibitor 2	-3.56892
Il18bp	interleukin 18 binding protein	-3.57017
Cfap52	cilia and flagella associated protein 52	-3.57236
Ttc16	tetratricopeptide repeat domain 16	-3.58495
Lrp2bp	Lrp2 binding protein	-3.58532
Plau	plasminogen activator, urokinase	-3.59403
Txlnb	taxilin beta	-3.59931
Ctsh	cathepsin H	-3.60476
Cdh1	cadherin 1	-3.61058
F5	coagulation factor V	-3.61197
Kif2c	kinesin family member 2C	-3.61687
Tmc8	transmembrane channel-like gene family 8	-3.61687
Parp14	poly (ADP-ribose) polymerase family, member 14	-3.61709
Styk1	serine/threonine/tyrosine kinase 1	-3.62269
Dnaaf3	dynein, axonemal assembly factor 3	-3.62288
Thbd	thrombomodulin	-3.62354
Fli1	Friend leukemia integration 1	-3.63268
Tbx15	T-box 15	-3.6386
Haao	3-hydroxyanthranilate 3,4-dioxygenase	-3.64688
Rslcan18	regulator of sex-limitation candidate 18	-3.64688
Tmem140	transmembrane protein 140	-3.65069
Efemp1	epidermal growth factor-containing fibulin-like extracellular matrix protein 1	-3.65139
Fcgr3	Fc receptor, IgG, low affinity III	-3.65315
C1qc	complement component 1, q subcomponent, C chain	-3.65454
Klhl6	kelch-like 6	-3.65473
Zc3h12a	zinc finger CCCH type containing 12A	-3.66362
Fsip1	fibrous sheath-interacting protein 1	-3.66655
Dyrk4	dual-specificity tyrosine-(Y)-phosphorylation regulated kinase 4	-3.66655
Aspg	asparaginase	-3.67115
Dnase2a	deoxyribonuclease II alpha	-3.67171
Tap1	transporter 1, ATP-binding cassette, sub-family B (MDR/TAP)	-3.67836
Atoh8	atonal bHLH transcription factor 8	-3.68057
Hvcn1	hydrogen voltage-gated channel 1	-3.70229
Vps26a	VPS26 retromer complex component A	-3.7048
Masp2	mannan-binding lectin serine peptidase 2	-3.70833
Col6a2	collagen, type VI, alpha 2	-3.70928
Slc15a3	solute carrier family 15, member 3	-3.71131
Rsph14	radial spoke head homolog 14 (Chlamydomonas)	-3.71749
Cd36	CD36 antigen	-3.72834
Ephx3	epoxide hydrolase 3	-3.7309
Ncf4	neutrophil cytosolic factor 4	-3.73379
Cd101	CD101 antigen	-3.73934
Prrg1	proline rich Gla (G-carboxyglutamic acid) 1	-3.73978
Cfh	complement component factor h	-3.75274
Map3k8	mitogen-activated protein kinase kinase kinase 8	-3.7533
Rab32	RAB32, member RAS oncogene family	-3.75354
Zfp185	zinc finger protein 185	-3.76299
Btk	Bruton agammaglobulinemia tyrosine kinase	-3.77395
Srpx	sushi-repeat-containing protein	-3.77971
Ifnlr1	interferon lambda receptor 1	-3.78127
Tfpi	tissue factor pathway inhibitor	-3.78253
Fas	Fas (TNF receptor superfamily member 6)	-3.79003
Dnah6	dynein, axonemal, heavy chain 6	-3.79034
Akr1b8	aldo-keto reductase family 1, member B8	-3.79143
Snord4a	small nucleolar RNA, C/D box 4A	-3.7925
Mir1981	microRNA 1981	-3.7925
Mir6921	microRNA 6921	-3.7925
Gm24148	predicted gene, 24148	-3.7925
Il27ra	interleukin 27 receptor, alpha	-3.79847
Pifo	primary cilia formation	-3.80269
Rbl1	retinoblastoma-like 1 (p107)	-3.8035
Ptafr	platelet-activating factor receptor	-3.81205
Fcrl1	Fc receptor-like 1	-3.81315
Ccr1	chemokine (C-C motif) receptor 1	-3.81589
Isg15	ISG15 ubiquitin-like modifier	-3.82
Cxcr4	chemokine (C-X-C motif) receptor 4	-3.83963
Fgl2	fibrinogen-like protein 2	-3.83978
Ptgis	prostaglandin I2 (prostacyclin) synthase	-3.84769
Gngt2	guanine nucleotide binding protein (G protein), gamma transducing activity polypeptide 2	-3.87195
Anxa3	annexin A3	-3.87616
Hc	hemolytic complement	-3.87816
H2-DMb2	histocompatibility 2, class II, locus Mb2	-3.88572
H2-K1	histocompatibility 2, K1, K region	-3.89583
Foxc2	forkhead box C2	-3.89907
Ggta1	glycoprotein galactosyltransferase alpha 1, 3	-3.90712
Oasl1	2'-5' oligoadenylate synthetase-like 1	-3.90791
Ankrd66	ankyrin repeat domain 66	-3.90791
Cfap53	cilia and flagella associated protein 53	-3.91025
Pycard	PYD and CARD domain containing	-3.91131
2510003B16Rik	RIKEN cDNA 2510003B16 gene	-3.91565
Fcgr1	Fc receptor, IgG, high affinity I	-3.91639
Pole2	polymerase (DNA directed), epsilon 2 (p59 subunit)	-3.92798
LOC100049077	uncharacterized LOC100049077	-3.94153
Mstn	myostatin	-3.9426
Hpgds	hematopoietic prostaglandin D synthase	-3.94539
Fam167b	family with sequence similarity 167, member B	-3.95195
Myb	myeloblastosis oncogene	-3.95534
Tcea3	transcription elongation factor A (SII), 3	-3.95932
Zfp947	zinc finger protein 947	-3.96008
Atad3aos	ATPase family, AAA domain containing 3A, opposite strand	-3.96611
Trpv4	transient receptor potential cation channel, subfamily V, member 4	-3.96922
Tk1	thymidine kinase 1	-3.97546
Chst9	carbohydrate (N-acetylgalactosamine 4-0) sulfotransferase 9	-3.97876
C5ar2	complement component 5a receptor 2	-3.99062
Irf7	interferon regulatory factor 7	-3.99114
Tfap2a	transcription factor AP-2, alpha	-3.99148
A930003A15Rik	RIKEN cDNA A930003A15 gene	-3.99148
Anxa2	annexin A2	-3.9936
Mir186	microRNA 186	-3.9948
LOC100503496	uncharacterized LOC100503496	-4.00191
Cd9	CD9 antigen	-4.00377
Erich2	glutamate rich 2	-4.00825
Oasl2	2'-5' oligoadenylate synthetase-like 2	-4.0089
Slfn9	schlafen 9	-4.01061
Upk1a	uroplakin 1A	-4.02217
Tspear	thrombospondin type laminin G domain and EAR repeats	-4.02217
Snord100	small nucleolar RNA, C/D box 100	-4.02217
Ager	advanced glycosylation end product-specific receptor	-4.02981
Pon3	paraoxonase 3	-4.03732
Marc1	mitochondrial amidoxime reducing component 1	-4.03883
Zar1l	zygote arrest 1-like	-4.03883
Snord47	small nucleolar RNA, C/D box 47	-4.03883
Akr1c13	aldo-keto reductase family 1, member C13	-4.04266
BC051019	cDNA sequence BC051019	-4.05004
Arhgap9	Rho GTPase activating protein 9	-4.05719
Fendrr	Foxf1 adjacent non-coding developmental regulatory RNA	-4.0581
Slc37a2	solute carrier family 37 (glycerol-3-phosphate transporter), member 2	-4.07479
Mdfi	MyoD family inhibitor	-4.08993
Slamf9	SLAM family member 9	-4.1018
Ifit1	interferon-induced protein with tetratricopeptide repeats 1	-4.12604
Foxd1	forkhead box D1	-4.1296
C1qa	complement component 1, q subcomponent, alpha polypeptide	-4.13371
Dnali1	dynein, axonemal, light intermediate polypeptide 1	-4.14252
Kcnk5	potassium channel, subfamily K, member 5	-4.14639
Cd53	CD53 antigen	-4.15554
Fcer1g	Fc receptor, IgE, high affinity I, gamma polypeptide	-4.16308
Rnase6	ribonuclease, RNase A family, 6	-4.16543
Tlr4	toll-like receptor 4	-4.16598
Mgp	matrix Gla protein	-4.16933
Cep55	centrosomal protein 55	-4.17359
Sh3bp2	SH3-domain binding protein 2	-4.17878
Phf11d	PHD finger protein 11D	-4.17997
Npff	neuropeptide FF-amide peptide precursor	-4.18443
Bche	butyrylcholinesterase	-4.19377
Car9	carbonic anhydrase 9	-4.19503
Lpl	lipoprotein lipase	-4.20147
Gpr183	G protein-coupled receptor 183	-4.21388
Cdc6	cell division cycle 6	-4.21407
Gm12250	predicted gene 12250	-4.21407
5430427O19Rik	RIKEN cDNA 5430427O19 gene	-4.21796
Ctss	cathepsin S	-4.21883
Mir7079	microRNA 7079	-4.2219
Bst1	bone marrow stromal cell antigen 1	-4.22367
H2-Q7	histocompatibility 2, Q region locus 7	-4.22425
Aoc3	amine oxidase, copper containing 3	-4.23436
Prr32	proline rich 32	-4.25331
Psmb8	proteasome (prosome, macropain) subunit, beta type 8 (large multifunctional peptidase 7)	-4.2538
Apod	apolipoprotein D	-4.25885
Fxyd5	FXYD domain-containing ion transport regulator 5	-4.26239
Rgs22	regulator of G-protein signalling 22	-4.26942
Rho	rhodopsin	-4.28908
Zmynd12	zinc finger, MYND domain containing 12	-4.28908
Lepr	leptin receptor	-4.29704
Msh5	mutS homolog 5	-4.31881
Fgl1	fibrinogen-like protein 1	-4.31881
Dmrta1	doublesex and mab-3 related transcription factor like family A1	-4.31881
Car13	carbonic anhydrase 13	-4.32466
Abca1	ATP-binding cassette, sub-family A (ABC1), member 1	-4.32795
Gm17757	predicted gene, 17757	-4.33034
Hpse	heparanase	-4.33542
Col8a2	collagen, type VIII, alpha 2	-4.33638
Itgbl1	integrin, beta-like 1	-4.34533
Osmr	oncostatin M receptor	-4.3454
Hsd17b1	hydroxysteroid (17-beta) dehydrogenase 1	-4.36017
Pkd2l2	polycystic kidney disease 2-like 2	-4.36017
Flnc	filamin C, gamma	-4.38008
Fyb	FYN binding protein	-4.39181
Slfn8	schlafen 8	-4.40117
Gm15612	predicted gene 15612	-4.42164
Il1a	interleukin 1 alpha	-4.42308
Ndc80	NDC80 kinetochore complex component	-4.43177
Cfap44	cilia and flagella associated protein 44	-4.43461
Oas1a	2'-5' oligoadenylate synthetase 1A	-4.45147
Slc6a19	solute carrier family 6 (neurotransmitter transporter), member 19	-4.4532
Procr	protein C receptor, endothelial	-4.46214
Tmem154	transmembrane protein 154	-4.46574
Cyp1b1	cytochrome P450, family 1, subfamily b, polypeptide 1	-4.50166
Cfap77	cilia and flagella associated protein 77	-4.52007
Zfp541	zinc finger protein 541	-4.52007
Mir431	microRNA 431	-4.53074
Adam8	a disintegrin and metallopeptidase domain 8	-4.53222
Ptpn18	protein tyrosine phosphatase, non-receptor type 18	-4.5452
Gmfg	glia maturation factor, gamma	-4.56149
Col1a2	collagen, type I, alpha 2	-4.58909
Parpbp	PARP1 binding protein	-4.59328
Cyba	cytochrome b-245, alpha polypeptide	-4.60636
Trim5	tripartite motif-containing 5	-4.6064
H2-D1	histocompatibility 2, D region locus 1	-4.62045
Cyp2f2	cytochrome P450, family 2, subfamily f, polypeptide 2	-4.6209
Naip2	NLR family, apoptosis inhibitory protein 2	-4.62662
Gfap	glial fibrillary acidic protein	-4.63625
Tgif1	TGFB-induced factor homeobox 1	-4.64331
Tgfbi	transforming growth factor, beta induced	-4.65298
Wfdc2	WAP four-disulfide core domain 2	-4.6672
Omd	osteomodulin	-4.6767
Pi15	peptidase inhibitor 15	-4.69992
Spin4	spindlin family, member 4	-4.69992
Maff	v-maf musculoaponeurotic fibrosarcoma oncogene family, protein F (avian)	-4.71609
Irf8	interferon regulatory factor 8	-4.71694
Chad	chondroadherin	-4.71916
Wdr95	WD40 repeat domain 95	-4.71916
Tbxas1	thromboxane A synthase 1, platelet	-4.7323
Sycp2	synaptonemal complex protein 2	-4.74112
Trem2	triggering receptor expressed on myeloid cells 2	-4.75589
Frk	fyn-related kinase	-4.75662
H2-Q4	histocompatibility 2, Q region locus 4	-4.76217
Six1	sine oculis-related homeobox 1	-4.76749
Ptpn6	protein tyrosine phosphatase, non-receptor type 6	-4.77039
Aim2	absent in melanoma 2	-4.77453
Acox2	acyl-Coenzyme A oxidase 2, branched chain	-4.78652
Spag16	sperm associated antigen 16	-4.79734
Cd180	CD180 antigen	-4.82297
Crb3	crumbs family member 3	-4.85636
Psme2b	protease (prosome, macropain) activator subunit 2B	-4.86655
Phf11b	PHD finger protein 11B	-4.88219
Cdkn2b	cyclin-dependent kinase inhibitor 2B (p15, inhibits CDK4)	-4.90133
Trim30d	tripartite motif-containing 30D	-4.90546
Col5a2	collagen, type V, alpha 2	-4.93151
Ly86	lymphocyte antigen 86	-4.95492
Ccl9	chemokine (C-C motif) ligand 9	-4.95765
Tnni2	troponin I, skeletal, fast 2	-4.96288
Btla	B and T lymphocyte associated	-4.97548
Ifi30	interferon gamma inducible protein 30	-4.97846
Naip1	NLR family, apoptosis inhibitory protein 1	-5.02086
Mis18bp1	MIS18 binding protein 1	-5.03681
Xlr	X-linked lymphocyte-regulated	-5.05051
Psmb9	proteasome (prosome, macropain) subunit, beta type 9 (large multifunctional peptidase 2)	-5.08474
Tgtp1	T cell specific GTPase 1	-5.09036
Tbc1d10c	TBC1 domain family, member 10c	-5.09571
Anxa4	annexin A4	-5.10394
Clec4n	C-type lectin domain family 4, member n	-5.10526
Gnb3	guanine nucleotide binding protein (G protein), beta 3	-5.10798
Stkld1	serine/threonine kinase-like domain containing 1	-5.10798
Mir7069	microRNA 7069	-5.10798
Ccr9	chemokine (C-C motif) receptor 9	-5.12513
Myo1g	myosin IG	-5.14683
Trim30a	tripartite motif-containing 30A	-5.17916
Isg20	interferon-stimulated protein	-5.20651
Ect2	ect2 oncogene	-5.23896
Adam18	a disintegrin and metallopeptidase domain 18	-5.24668
Rbm47	RNA binding motif protein 47	-5.24758
Myo1f	myosin IF	-5.25749
Vsx1	visual system homeobox 1	-5.26719
Nlrp3	NLR family, pyrin domain containing 3	-5.26719
Gpr84	G protein-coupled receptor 84	-5.27316
Gbp6	guanylate binding protein 6	-5.28073
Lrrc71	leucine rich repeat containing 71	-5.29118
Sp140	Sp140 nuclear body protein	-5.29524
Ppic	peptidylprolyl isomerase C	-5.29743
Snora43	small nucleolar RNA, H/ACA box 43	-5.31433
Serping1	serine (or cysteine) peptidase inhibitor, clade G, member 1	-5.31469
Cd84	CD84 antigen	-5.32679
Adamtsl3	ADAMTS-like 3	-5.32725
F9	coagulation factor IX	-5.33094
C530044C16Rik	RIKEN cDNA C530044C16 gene	-5.36698
Tns4	tensin 4	-5.38051
Pirb	paired Ig-like receptor B	-5.38171
Emp1	epithelial membrane protein 1	-5.3822
Fblim1	filamin binding LIM protein 1	-5.38226
Cd300a	CD300A molecule	-5.44724
Gh	growth hormone	-5.45206
Sp110	Sp110 nuclear body protein	-5.48928
Cd68	CD68 antigen	-5.49301
Brip1	BRCA1 interacting protein C-terminal helicase 1	-5.49679
Steap1	six transmembrane epithelial antigen of the prostate 1	-5.51123
Ccdc125	coiled-coil domain containing 125	-5.51123
Mia	melanoma inhibitory activity	-5.51427
Cd109	CD109 antigen	-5.53483
Ogn	osteoglycin	-5.54521
H2-Ob	histocompatibility 2, O region beta locus	-5.54941
Neat1	nuclear paraspeckle assembly transcript 1 (non-protein coding)	-5.57746
Spata17	spermatogenesis associated 17	-5.57823
4930447C04Rik	RIKEN cDNA 4930447C04 gene	-5.582
Vnn1	vanin 1	-5.58416
Cldn2	claudin 2	-5.6082
Gm13251	predicted gene 13251	-5.61903
Ccl12	chemokine (C-C motif) ligand 12	-5.63002
Fgf7	fibroblast growth factor 7	-5.63826
Cfap70	cilia and flagella associated protein 70	-5.65414
Bnc2	basonuclin 2	-5.65414
Gm1966	predicted gene 1966	-5.65414
Cd200r1	CD200 receptor 1	-5.69152
Sfrp4	secreted frizzled-related protein 4	-5.74415
Gm4951	predicted gene 4951	-5.81902
Ush1c	Usher syndrome 1C	-5.84214
4930550C14Rik	RIKEN cDNA 4930550C14 gene	-5.84214
Rab20	RAB20, member RAS oncogene family	-5.84994
Sntn	sentan, cilia apical structure protein	-5.84994
Rsad2	radical S-adenosyl methionine domain containing 2	-5.855
Rhod	ras homolog family member D	-5.85678
C4a	complement component 4A (Rodgers blood group)	-5.90353
Lilra5	leukocyte immunoglobulin-like receptor, subfamily A (with TM domain), member 5	-5.90598
AW112010	expressed sequence AW112010	-5.90778
Cd300c2	CD300C molecule 2	-5.91424
Lbp	lipopolysaccharide binding protein	-5.9245
Troap	trophinin associated protein	-5.93145
Dcn	decorin	-5.93152
Gm17455	predicted gene, 17455	-5.94103
C1s1	complement component 1, s subcomponent 1	-5.95271
Plscr2	phospholipid scramblase 2	-5.97514
Mfap5	microfibrillar associated protein 5	-5.99778
Il2rg	interleukin 2 receptor, gamma chain	-6.00148
Snord88c	small nucleolar RNA, C/D box 88C	-6.00721
Nhlrc4	NHL repeat containing 4	-6.02147
Asb10	ankyrin repeat and SOCS box-containing 10	-6.02226
Iigp1	interferon inducible GTPase 1	-6.02836
Arl11	ADP-ribosylation factor-like 11	-6.03017
Rad51b	RAD51 paralog B	-6.06584
Mirt1	myocardial infarction associated transcript 1	-6.06584
Csf3r	colony stimulating factor 3 receptor (granulocyte)	-6.07708
Ms4a6d	membrane-spanning 4-domains, subfamily A, member 6D	-6.09375
Ifi27l2a	interferon, alpha-inducible protein 27 like 2A	-6.10674
Ccdc69	coiled-coil domain containing 69	-6.12755
Bst2	bone marrow stromal cell antigen 2	-6.15101
Serpina3n	serine (or cysteine) peptidase inhibitor, clade A, member 3N	-6.16674
BC147527	cDNA sequence BC147527	-6.21928
Mybl2	myeloblastosis oncogene-like 2	-6.21955
Slc39a4	solute carrier family 39 (zinc transporter), member 4	-6.21955
Naip6	NLR family, apoptosis inhibitory protein 6	-6.21961
Tmem106a	transmembrane protein 106A	-6.23398
Ccdc146	coiled-coil domain containing 146	-6.27327
Tyrobp	TYRO protein tyrosine kinase binding protein	-6.28531
AU022793	expressed sequence AU022793	-6.29182
Ccdc180	coiled-coil domain containing 180	-6.33461
Epsti1	epithelial stromal interaction 1 (breast)	-6.35268
4930444P10Rik	RIKEN cDNA 4930444P10 gene	-6.36995
Trim6	tripartite motif-containing 6	-6.36995
Slc11a1	solute carrier family 11 (proton-coupled divalent metal ion transporters), member 1	-6.37603
Hp	haptoglobin	-6.38426
Ugt1a7c	UDP glucuronosyltransferase 1 family, polypeptide A7C	-6.38993
Capg	capping protein (actin filament), gelsolin-like	-6.40245
Gm5127	predicted gene 5127	-6.41902
C1qtnf3	C1q and tumor necrosis factor related protein 3	-6.44889
Lag3	lymphocyte-activation gene 3	-6.4657
Psma8	proteasome (prosome, macropain) subunit, alpha type, 8	-6.469
Prrx2	paired related homeobox 2	-6.50904
Mpeg1	macrophage expressed gene 1	-6.51052
Tgtp2	T cell specific GTPase 2	-6.57605
Col1a1	collagen, type I, alpha 1	-6.57744
Cfb	complement factor B	-6.58306
Fam26f	family with sequence similarity 26, member F	-6.5865
Pif1	PIF1 5'-to-3' DNA helicase	-6.59559
Eda2r	ectodysplasin A2 receptor	-6.61876
Gm15760	predicted gene 15760	-6.61876
Ucma	upper zone of growth plate and cartilage matrix associated	-6.62895
Hist1h3d	histone cluster 1, H3d	-6.63385
Mamdc2	MAM domain containing 2	-6.64721
Slc43a3	solute carrier family 43, member 3	-6.68828
Mndal	myeloid nuclear differentiation antigen like	-6.7039
Ikbke	inhibitor of kappaB kinase epsilon	-6.73646
Cd80	CD80 antigen	-6.75334
Pla2g2d	phospholipase A2, group IID	-6.75334
Btc	betacellulin, epidermal growth factor family member	-6.77024
Dnaaf1	dynein, axonemal assembly factor 1	-6.77024
Vim	vimentin	-6.8179
S100a9	S100 calcium binding protein A9 (calgranulin B)	-6.85455
Gpr160	G protein-coupled receptor 160	-6.86728
Fam216b	family with sequence similarity 216, member B	-6.87386
Col6a5	collagen, type VI, alpha 5	-6.91069
Csf2rb	colony stimulating factor 2 receptor, beta, low-affinity (granulocyte-macrophage)	-6.9412
Gbp11	guanylate binding protein 11	-7.00654
Fam46c	family with sequence similarity 46, member C	-7.00892
Ms4a6c	membrane-spanning 4-domains, subfamily A, member 6C	-7.01558
Ctla2b	cytotoxic T lymphocyte-associated protein 2 beta	-7.11452
Ccdc121	coiled-coil domain containing 121	-7.15949
Card11	caspase recruitment domain family, member 11	-7.1764
Ifi44	interferon-induced protein 44	-7.18247
Itgae	integrin alpha E, epithelial-associated	-7.21797
Tlr2	toll-like receptor 2	-7.22837
Tm6sf2	transmembrane 6 superfamily member 2	-7.25225
Igsf6	immunoglobulin superfamily, member 6	-7.2641
Cd44	CD44 antigen	-7.26596
Slc26a7	solute carrier family 26, member 7	-7.32196
H2-Eb1	histocompatibility 2, class II antigen E beta	-7.42838
Mroh3	maestro heat-like repeat family member 3	-7.44087
Loxl2	lysyl oxidase-like 2	-7.45046
Bub1	BUB1, mitotic checkpoint serine/threonine kinase	-7.54409
Nek5	NIMA (never in mitosis gene a)-related expressed kinase 5	-7.55014
Siglecf	sialic acid binding Ig-like lectin F	-7.55243
Adamts14	a disintegrin-like and metallopeptidase (reprolysin type) with thrombospondin type 1 motif, 14	-7.61744
Gm20605	predicted gene 20605	-7.62513
Gm4724	predicted gene 4724	-7.65623
Apobec1	apolipoprotein B mRNA editing enzyme, catalytic polypeptide 1	-7.66219
Ptprc	protein tyrosine phosphatase, receptor type, C	-7.68462
A630001G21Rik	RIKEN cDNA A630001G21 gene	-7.98244
Tlr1	toll-like receptor 1	-7.99821
Neurl3	neuralized E3 ubiquitin protein ligase 3	-8.03279
AI662270	expressed sequence AI662270	-8.0353
1700003F12Rik	RIKEN cDNA 1700003F12 gene	-8.05561
Anxa1	annexin A1	-8.07926
Kif15	kinesin family member 15	-8.08163
Ccr2	chemokine (C-C motif) receptor 2	-8.16422
Mir3060	microRNA 3060	-8.22192
Folr2	folate receptor 2 (fetal)	-8.38538
Cd48	CD48 antigen	-8.38924
Casp4	caspase 4, apoptosis-related cysteine peptidase	-8.43719
Cxcl16	chemokine (C-X-C motif) ligand 16	-8.4609
Cd74	CD74 antigen (invariant polypeptide of major histocompatibility complex, class II antigen-associated)	-8.46951
Ddx60	DEAD (Asp-Glu-Ala-Asp) box polypeptide 60	-8.5032
Ifi203	interferon activated gene 203	-8.50631
Ptgdr	prostaglandin D receptor	-8.5582
Serpinf2	serine (or cysteine) peptidase inhibitor, clade F, member 2	-8.61918
Kcne2	potassium voltage-gated channel, Isk-related subfamily, gene 2	-8.72503
Ttll6	tubulin tyrosine ligase-like family, member 6	-8.7451
Tnfrsf4	tumor necrosis factor receptor superfamily, member 4	-8.75357
Naip5	NLR family, apoptosis inhibitory protein 5	-8.96358
C4b	complement component 4B (Chido blood group)	-8.9887
Cd52	CD52 antigen	-9.10918
Ccl6	chemokine (C-C motif) ligand 6	-9.13189
Fcgr2b	Fc receptor, IgG, low affinity IIb	-9.19276
H19	H19, imprinted maternally expressed transcript	-9.52209
Wisp2	WNT1 inducible signaling pathway protein 2	-9.6285
Mir374b	microRNA 374b	-9.69839
H2-Aa	histocompatibility 2, class II antigen A, alpha	-9.7178
Vwce	von Willebrand factor C and EGF domains	-9.77377
Ccdc67	coiled-coil domain containing 67	-9.80072
Tnfaip2	tumor necrosis factor, alpha-induced protein 2	-9.87371
Apoo-ps	apolipoprotein O, pseudogene	-9.96049
H2-Ab1	histocompatibility 2, class II antigen A, beta 1	-10.0453
Ccdc187	coiled-coil domain containing 187	-10.0646
Gpr35	G protein-coupled receptor 35	-10.165
Smim5	small integral membrane protein 5	-10.2318
Gp1bb	glycoprotein Ib, beta polypeptide	-10.2399
C3ar1	complement component 3a receptor 1	-10.2664
C130021I20Rik	Riken cDNA C130021I20 gene	-10.3285
Glrp1	glutamine repeat protein 1	-10.5514
Prrg4	proline rich Gla (G-carboxyglutamic acid) 4 (transmembrane)	-10.5924
Lum	lumican	-10.6126
Gimap4	GTPase, IMAP family member 4	-10.6495
S100a4	S100 calcium binding protein A4	-10.6858
Jchain	immunoglobulin joining chain	-10.8298
Cers1	ceramide synthase 1	-10.8765
Acap1	ArfGAP with coiled-coil, ankyrin repeat and PH domains 1	-10.9402
1500015O10Rik	RIKEN cDNA 1500015O10 gene	-10.991
Treml2	triggering receptor expressed on myeloid cells-like 2	-11.0092
Ccl22	chemokine (C-C motif) ligand 22	-11.1202
Pde6a	phosphodiesterase 6A, cGMP-specific, rod, alpha	-11.329
Prl	prolactin	-11.3341
Acp5	acid phosphatase 5, tartrate resistant	-11.5274
Nlrp1b	NLR family, pyrin domain containing 1B	-11.751
Timp1	tissue inhibitor of metalloproteinase 1	-12.2524
Ttr	transthyretin	-12.2655
Sctr	secretin receptor	-12.5697
Gm38426	predicted gene, 38426	-12.6109
Casp12	caspase 12	-12.6507
Ticam2	toll-like receptor adaptor molecule 2	-12.7592
Csf2rb2	colony stimulating factor 2 receptor, beta 2, low-affinity (granulocyte-macrophage)	-12.8142
D730005E14Rik	RIKEN cDNA D730005E14 gene	-13.2731
Atf3	activating transcription factor 3	-13.296
Ch25h	cholesterol 25-hydroxylase	-13.8032
Mx1	MX dynamin-like GTPase 1	-14.9577
Ms4a7	membrane-spanning 4-domains, subfamily A, member 7	-15.3134
Bcl2a1b	B cell leukemia/lymphoma 2 related protein A1b	-15.3738
A2m	alpha-2-macroglobulin	-15.3775
Col3a1	collagen, type III, alpha 1	-15.462
S100a8	S100 calcium binding protein A8 (calgranulin A)	-16.548
Oas2	2'-5' oligoadenylate synthetase 2	-17.0532
Bcl3	B cell leukemia/lymphoma 3	-17.086
Nlrc5	NLR family, CARD domain containing 5	-17.4104
Lox	lysyl oxidase	-17.4559
Thbs1	thrombospondin 1	-17.9728
Cxcl10	chemokine (C-X-C motif) ligand 10	-18.5647
B430306N03Rik	RIKEN cDNA B430306N03 gene	-18.8206
Ifi204	interferon activated gene 204	-18.8653
Pyhin1	pyrin and HIN domain family, member 1	-19.1514
Ly9	lymphocyte antigen 9	-20.8357
Cd72	CD72 antigen	-21.3201
Ccl3	chemokine (C-C motif) ligand 3	-22.186
Lrp2	low density lipoprotein receptor-related protein 2	-22.9972
Zmynd15	zinc finger, MYND-type containing 15	-23.3823
Milr1	mast cell immunoglobulin like receptor 1	-23.5361
Steap4	STEAP family member 4	-23.6137
Cybb	cytochrome b-245, beta polypeptide	-23.848
Gpnmb	glycoprotein (transmembrane) nmb	-24.2344
Spp1	secreted phosphoprotein 1	-26.398
Adgb	androglobin	-28.3902
Wfdc17	WAP four-disulfide core domain 17	-28.6288
Apoc1	apolipoprotein C-I	-29.1464
Cd300lf	CD300 molecule like family member F	-30.6492
AI607873	expressed sequence AI607873	-32.6186
Cd22	CD22 antigen	-34.5663
Fcgr4	Fc receptor, IgG, low affinity IV	-37.1091
AB124611	cDNA sequence AB124611	-45.7098
Lyz2	lysozyme 2	-50.3733
Rps27	ribosomal protein S27	-50.5258
Hcar2	hydroxycarboxylic acid receptor 2	-51.7659
Itgax	integrin alpha X	-52.2033
Nutf2-ps1	nuclear transport factor 2, pseudogene 1	-53.362
Tgm1	transglutaminase 1, K polypeptide	-54.3888
Clec7a	C-type lectin domain family 7, member a	-64.3649
Lilrb4a	leukocyte immunoglobulin-like receptor, subfamily B, member 4A	-66.1932
Cxcl5	chemokine (C-X-C motif) ligand 5	-66.2764
Rgs1	regulator of G-protein signaling 1	-72.762
Hist2h3c1	histone cluster 2, H3c1	-75.4014
Ino80d	INO80 complex subunit D	-101.96
Lgals3	lectin, galactose binding, soluble 3	-108
Lcn2	lipocalin 2	-132.093
C3	complement component 3	-181.553
